1 **Mutation of the *ALBOSTRIANS* Ohnologous Gene *HvCMF3***  
2 **Impairs Chloroplast Development and Thylakoid Architecture**  
3 **in Barley due to Reduced Plastid Translation**

4 Mingjiu Li<sup>a</sup>, Goetz Hensel<sup>b</sup>, Michael Melzer<sup>c</sup>, Astrid Junker<sup>d</sup>, Henning Tschiersch<sup>e</sup>,  
5 Daniel Arend<sup>f</sup>, Jochen Kumlehn<sup>b</sup>, Thomas Börner<sup>g,1</sup> and Nils Stein<sup>a,h,1</sup>

6 <sup>a</sup>Genomics of Genetic Resources Group, Department of Genebank, Leibniz Institute of  
7 Plant Genetics and Crop Plant Research (IPK), 06466 Seeland, Germany

8 <sup>b</sup>Plant Reproductive Biology Group, Department of Physiology and Cell Biology, IPK,  
9 06466 Seeland, Germany

10 <sup>c</sup>Structural Cell Biology Group, Department of Physiology and Cell Biology, IPK, 06466  
11 Seeland, Germany

12 <sup>d</sup>Acclimation Dynamics and Phenotyping Group, Department of Molecular Genetics,  
13 IPK, 06466 Seeland, Germany

14 <sup>e</sup>Heterosis Group, Department of Molecular Genetics, IPK, 06466 Seeland, Germany

15 <sup>f</sup>Bioinformatics and Information Technology Group, Department of Breeding Research,  
16 IPK, 06466 Seeland, Germany

17 <sup>g</sup>Molecular Genetics Group, Institute of Biology, Humboldt University, 10115 Berlin,  
18 Germany

19 <sup>h</sup>Department of Crop Sciences, Center for Integrated Breeding Research (CiBreed),  
20 Georg-August-University, Göttingen, Germany

21 <sup>1</sup>**Corresponding authors:** Thomas Börner: [thomas.boerner@rz.hu-berlin.de](mailto:thomas.boerner@rz.hu-berlin.de); Nils  
22 Stein; [stein@ipk-gatersleben.de](mailto:stein@ipk-gatersleben.de)

23 **Short title:** HvASL/HvCMF3 needed for chloroplast development

24 **One-sentence summary:** Phylogenetic and mutant analyses of the barley protein HvCMF3  
25 (ALBOSTRIANS-LIKE) identified, in higher plants, a subfamily of CCT domain proteins with  
26 essential function in chloroplast development.

27

28 The author responsible for distribution of materials integral to the findings presented in  
29 this article in accordance with the policy described in the Instructions for Authors  
30 ([www.plantcell.org](http://www.plantcell.org)) is: Nils Stein ([stein@ipk-gatersleben.de](mailto:stein@ipk-gatersleben.de))

31 **ABSTRACT**

32 Gene pairs resulting from whole genome duplication (WGD), so-called ohnologous  
33 genes, are retained only if at least one gene of the pair undergoes neo- or  
34 subfunctionalization. Sequence-based phylogenetic analyses of the ohnologous genes  
35 *ALBOSTRIANS* (*HvAST/HvCMF7*) and *ALBOSTRIANS-LIKE* (*HvASL/HvCMF3*) of  
36 barley (*Hordeum vulgare*) revealed that they belong to a newly identified subfamily of  
37 genes encoding CCT domain proteins with putative N-terminal chloroplast transit  
38 peptides. Recently, we showed that *HvCMF7* is needed for chloroplast ribosome  
39 biogenesis. Here we demonstrate that mutations in *HvCMF3* lead to seedlings delayed  
40 in development. They exhibit a *xantha* phenotype and successively develop pale green  
41 leaves. Compared to the wild type, plastids of the mutant seedlings show decreased  
42 PSII efficiency and lower amounts of ribosomal RNAs; they contain less thylakoids and  
43 grana with a higher number of more loosely stacked thylakoid membranes. Site-directed  
44 mutagenesis of *HvCMF3* identified a previously unknown functional region, which is  
45 highly conserved within this subfamily of CCT domain containing proteins.  
46 *HvCMF3:GFP* fusion constructs localized to plastids. *Hvcmf3Hvcmf7* double mutants  
47 indicated epistatic activity of *HvCMF7* over *HvCMF3*. The chloroplast ribosome  
48 deficiency is discussed as the primary defect of the *Hvcmf3* mutants. Our data suggests  
49 that *HvCMF3* and *HvCMF7* have similar but not identical functions.

## 50 INTRODUCTION

51 Chloroplasts are the photosynthetic active type of plastids. Functional chloroplasts  
52 normally exhibit an ellipsoidal shape and contain stroma and thylakoid membranes. The  
53 thylakoid membranes are the site of light-dependent photosynthesis reactions as  
54 mediated by four protein complexes – photosystem I (PSI), photosystem II (PSII),  
55 cytochrome  $b_6f$  and ATPase (Dekker and Boekema, 2005). Thylakoid membranes  
56 appear either in stacks of thylakoid discs, termed grana, or they exist as stroma  
57 lamellae, sheets of lipid-bilayers interconnecting the grana. While PSII is mainly found in  
58 the grana membranes, PSI and the ATPase complex are enriched in the lamellae, and  
59 the cytochrome  $b_6f$  complex is distributed evenly between the two structures (Dekker  
60 and Boekema, 2005).

61 Chloroplasts originated from photosynthetic cyanobacteria (Gould et al., 2008). They  
62 contain their own genome with a core set of approximately 100 genes inherited from the  
63 cyanobacterial ancestor and possess their own machinery for gene expression, i.e., for  
64 transcription, transcript processing and translation (Pogson and Albrecht, 2011; Börner  
65 et al., 2014; Pogson et al., 2015). Extensive studies have demonstrated that chloroplast  
66 development and function require the import of nucleus-encoded proteins; actually,  
67 more than 95% of the chloroplast proteins are encoded by the nuclear genome and  
68 subsequently targeted to the chloroplasts, in most cases with help of an N-terminal  
69 transit peptide, cTP (Leister, 2003; Lee and Hwang, 2018).

70 The extant land plants exhibit very high species diversity, which is the outcome of a long  
71 lasting evolutionary process, during which polyploidisation is considered as having  
72 provided one of the major driving forces (De Bodt et al., 2005; Soltis et al., 2009; Lafon-  
73 Placette et al., 2016; Van de Peer et al., 2017; Vamosi et al., 2018). Whole genome  
74 duplication (WGD) is widespread across land plants as revealed by genome sequencing  
75 of an increasing number of species (Muhlhausen and Kollmar, 2013). After WGD  
76 genomes tend to return - through a process called diploidisation - to the more stable  
77 and less redundant diploid stage. Thus, one copy of all the duplicated genes will be lost  
78 in a more or less random fashion. There are three possibilities for the evolutionary fate  
79 of duplicated genes (Lynch and Conery, 2000). In most of the cases, the function of one

80 copy is lost either by complete deletion of the gene or through accumulating non-sense  
81 or deleterious mutations. In maize, a recent auto-polyploid, nearly half of the duplicated  
82 genes were lost during evolution (Lai et al., 2004). If both ohnologous genes are  
83 retained, one copy typically acquires a novel, beneficial function (neo-functionalization),  
84 conserved during natural selection (Lynch and Conery, 2000). The second scenario to  
85 maintain duplicated gene pairs is by sub-functionalization; each gene of an ohnologous  
86 pair partially retain the original function, but only together providing the complete  
87 functional capacity of the ancestral gene (Force et al., 1999).

88 A common ancestor of the family of the *Poaceae*, comprising all extant cereal crops,  
89 underwent WGD at around 70 million years ago (Paterson et al., 2004). Traces of this  
90 WGD are conserved in the barley (*Hordeum vulgare*) genome (Thiel et al., 2009) and  
91 were detected, e.g. as pairs of ohnologs among genes coding for CCT domain  
92 containing proteins in the genomes of cereal crops (Cockram et al., 2012). The CCT  
93 domain [from the three *Arabidopsis* (*Arabidopsis thaliana*) proteins CONSTANS,  
94 CONSTANS-LIKE and TIMING OF CAB1] comprises 43 amino acids and is found near  
95 the C-terminus of numerous proteins. As far as a function could be assigned, CCT  
96 domain proteins are transcription (co-) factors typically involved in modulating flowering  
97 time, light-induced signaling and circadian rhythms.

98 Among the genes with a proposed ohnologous relationship, the genes *HvCMF7*  
99 (*ALBOSRIANS*) and its paralog *HvCMF3* (*ALBOSTRIANS-LIKE*) are representing  
100 ohnologs within the CCT domain gene family of barley (Cockram et al., 2012; Li et al.,  
101 2019). A mutation in *HvCMF7* confers the variegated “*albostrians*” phenotype (Li et al.,  
102 2019). Besides incomplete penetrance of its variegation phenotype (Hagemann and  
103 Scholz, 1962) one of the most prominent characteristics of the *albostrians* mutant are  
104 the ribosome-free plastids leading to albino leaves and albino sectors of striped leaves  
105 (Hess et al., 1993). The mutant served as a model to study the cross-talk between  
106 nucleus and the other DNA-containing organelles and greatly extended the field of  
107 chloroplast biology (Bradbeer et al., 1979; Hess et al., 1993; Zhelyazkova et al., 2012).  
108 The lack of plastid ribosomes and the albino phenotype of the *albostrians* mutant  
109 indicate that the presence of the wild-type allele of the ohnologous gene *HvCMF3*

110 cannot rescue the effects of the mutation in *HvCMF7* suggesting that the two ohnologs  
111 do not act at redundancy. Strikingly, the ALBOSTRIANS protein *HvCMF7* was localized  
112 to chloroplasts and the phenotype of the *albostrians* mutant implies that *HvCMF7* plays  
113 a role in the biogenesis and/or stability of chloroplast ribosomes, i.e., has a function and  
114 location entirely different from all previously investigated CCT domain proteins (Li et al.,  
115 2019). In contrast, the Arabidopsis homolog of *HvCMF7* and *HvCMF3*, *AtCIA2*, codes  
116 for a nuclear transcription factor regulating genes for the transport of nuclear encoded  
117 proteins into chloroplasts and for the biogenesis of chloroplast ribosomes (Sun et al.,  
118 2009). This function and localization is more similar to the published functions of  
119 previously investigated CCT domain proteins. Intriguingly, the *Atcia2* mutant exhibited a  
120 pale green phenotype and no indication of leaf variegation (Sun et al., 2001).

121 Here we report on a phylogenetic analysis of CMF genes related to the *albostrians* gene  
122 *HvCMF7* and its homolog *HvCMF3* supporting the ohnologous relationship of *HvCMF7*  
123 and *HvCMF3* and of their Arabidopsis homologs, *AtCIA2* and *AtCIL*. To find out if  
124 *HvCMF3* might have a function more similar than *HvCMF7* to their Arabidopsis homolog  
125 *AtCIA2*, we analyzed a series of *Hvcmf3* mutants. Mutants of the gene *HvCMF3* were  
126 obtained by chemical or Cas9 endonuclease-triggered site-directed mutagenesis to  
127 determine the phenotype conferred by a non-functional gene. Site-directed mutagenesis  
128 led to the identification of a highly conserved, previously unknown protein domain,  
129 which supposedly plays a key role in the determination of phenotype severity. The  
130 observed chlorophyll-deficient phenotype was correlated with impaired photosynthesis,  
131 distinctly decreased chloroplast rRNA levels, altered stacking of thylakoids and reduced  
132 numbers of grana in overall smaller chloroplasts. *HvCMF3*:GFP fusions localized to  
133 plastids; a feature that is shared by the protein encoded by its ohnologous gene  
134 *HvCMF7* and which is distinct from the behavior of the Arabidopsis homolog *AtCIA2*.

## 135 **RESULTS**

### 136 **Phylogenetic Relationships of *HvASL* Homologs in Monocots and Dicots**

137 The sequence of the barley genome (Mascher et al., 2017) predicts the gene model  
138 *HORVU6Hr1G021460.2* as the closest homolog of *HvCMF7*. We confirmed the

139 predicted gene structure by cDNA sequencing. The gene contains three exons  
140 separated by two introns, and encodes a protein of 490 amino acids (AA) in length.  
141 Sequence comparison of *HvCMF7* and *HORVU6Hr1G021460.2* revealed that both  
142 homologs share 50.5% identity at protein level. The gene *HORVU6Hr1G021460.2* was  
143 previously designated as *HvCMF3* in a study on the evolution of the CCT domain-  
144 containing gene family (CMF) in *Poaceae* (Cockram et al., 2012). Homology searches  
145 for *HvCMF3* and *HvCMF7* against Phytozome v12.1.6 (Goodstein et al., 2012) identified  
146 131 homologous genes in 66 angiosperm species, while in 14 species with an earlier  
147 evolutionary history (Supplemental Dataset 1) no genes with clear homology to  
148 *HvCMF3/HvCMF7* could be determined. As we found a homolog also in *Amborella*  
149 representing the most basal lineage in the clade of angiosperms (Drew et al., 2014), we  
150 used in a further search for homologs the *Amborella* sequence as query which lead to  
151 the identification of homologous sequences in the genomes of gymnosperms. The  
152 homologous genes were filtered by integrity and correctness of their coding sequence;  
153 as a result, 91 genes from 48 species were included in an evolutionary analysis  
154 (Supplemental Dataset 1). The maximum likelihood tree shows that *Amborella*  
155 *trichopoda* forms a sister clade to all the remaining angiosperm plants in accordance  
156 with previous reports (Drew et al., 2014). The monocot and dicot species separate from  
157 the main branch and form independent clades (Figure 1). Paralogous genes of all grass  
158 species in the *Poaceae* family are divided and grouped together forming two subclades.  
159 Similarly, we observed this pattern also for the dicot families *Salicaceae*, *Fabaceae*,  
160 *Crassulaceae* and *Brassicaceae*, respectively. The conserved presence of paralogous  
161 gene pairs in grass species indicates their origin from the ancient whole-genome  
162 duplication shared among grass species (Paterson et al., 2004; Thiel et al., 2009;  
163 Cockram et al., 2012), i.e., they represent ohnologous genes (ohnologs). Interestingly,  
164 tetraploid species in the mono- and dicots, like *Panicum virgatum* and *Brassica rapa*,  
165 consistently contain two pairs of paralogs. Evidently, all ohnologs of *HvCMF3* and  
166 *HvCMF7* have been retained in the genomes of all analyzed monocot and dicot plant  
167 families, strongly suggesting that all ohnologs fulfil important functions in angiosperm  
168 plants and have non-redundant functions.

169 Protein alignments based on 131 HvCMF3/HvCMF7 homologs from 66 monocot and  
170 dicot species showed that the C-terminal CCT domain is conserved across all analyzed  
171 plant species. These proteins have also a putative N-terminal chloroplast transit peptide  
172 (cTP) as predicted by ChloroP (Emanuelsson et al., 1999) (Supplemental Dataset 2)  
173 suggesting a role of all or most of these proteins (including the ancestor at the origin of  
174 all angiosperms) in chloroplast development and function. In the present study we  
175 aimed to make first steps in the elucidation of the biological function of the barley gene  
176 *HvCMF3* (*ALBOSTRIANS-LIKE*).

### 177 ***Hvcmf3* Mutant Exhibits a *xantha*-to-green Phenotype**

178 We screened for mutants of *HvCMF3* by TILLING of an EMS-induced mutant population  
179 consisting of more than 7,500 M<sub>2</sub> plants (Gottwald et al., 2009). Fifty-four M<sub>2</sub> mutant  
180 families were identified representing 28 non-synonymous, 24 synonymous and 2 pre-  
181 stop mutations (Figure 2A and 2B, Supplemental Table 1 and 2) and all mutant families  
182 were assigned to phenotypic and genotypic analyses. Owing to the ohnologous  
183 relationship of *HvCMF3* and *HvCMF7*, we screened for leaf colour variation in all  
184 *HvCMF3* TILLING families. We could not observe any chlorophyll-deficient phenotype in  
185 mutant families representing induced non-synonymous or synonymous single  
186 nucleotide polymorphisms. In contrast, all homozygous mutants identified at M<sub>3</sub> stage of  
187 the pre-stop TILLING family 4383-1 (carries a guanine to adenine transition at  
188 nucleotide position +861 leading to a premature stop codon) exhibited a chlorophyll-  
189 deficient phenotype; while the segregating wild type and heterozygous plants of this  
190 family produced green seedlings (Figure 2C, Supplemental Figure 1 and Supplemental  
191 Table 3). The linkage was confirmed by analysis of 245 M<sub>4</sub> individuals derived from nine  
192 heterozygous M<sub>3</sub> plants. The phenotype of the homozygous *Hvcmf3* mutant in TILLING  
193 family 4383-1 resembles previously identified *xantha* mutants of barley (Henningsson et  
194 al., 1993). The *xantha* leaves gradually turn into green along with plant growth  
195 (Supplemental Figure 1 and Figure 6F). Therefore, we describe the *Hvcmf3* mutant  
196 phenotype as *xantha*-to-green. Homozygous mutants of the second pre-stop TILLING  
197 family 13082-1 (carries a transversion from adenine to thymine at nucleotide position  
198 +1135 leading to a premature stop codon) were identified only after propagating to the



199 M<sub>5</sub> generation. Also, M<sub>5</sub> homozygous mutants of family 13082-1 exhibit a *xantha*-to-  
200 green phenotype but in comparison to the pre-stop line 4383-1 requires a shorter time-  
201 span for recovery to fully green (Figure 2C). The two TILLING mutant alleles of 4383-1  
202 and 13082-1 were designated as *Hvcmf3-1* and *Hvcmf3-2*, respectively. F<sub>1</sub> hybrids  
203 formed between both mutants (*Hvcmf3-1/Hvcmf3-2*) displayed consistently a *xantha*-to-  
204 green phenotype, thus demonstrating the allelic state of both mutations (Figure 2C),  
205 which was further confirmed by analyzing an additional 50 F<sub>2</sub> plants (*Hvcmf3-1/Hvcmf3-*  
206 *2*) derived from the four F<sub>1</sub> hybrids.

207 Based on these results we concluded that *HvCMF3*, similar to *HvCMF7*, plays a  
208 fundamental role in chloroplast development.

### 209 **Functional Validation of *HvCMF3* by Site-directed Mutagenesis Using Cas9** 210 **Endonuclease**

211 Remarkably, the recovery rate of *xantha*-to-green phenotype of the *Hvcmf3-1* mutant  
212 was much slower than that of the *Hvcmf3-2* mutant. To test whether this was an effect  
213 of the different positions in the coding region of the gene of the two mutations  
214 (Supplemental Figure 3C), we adopted RNA-guided Cas9 endonuclease mediated site-  
215 directed mutagenesis in order to reproduce the position effect of phenotype severity.  
216 Two guide RNAs (gRNAs) were designed surrounding the position of the non-sense  
217 mutation of TILLING mutant 4383-1 (Figure 3A). In total, 36 primary regenerants were  
218 derived from *Agrobacterium*-mediated co-transformation of both gRNAs. Thirty-four of  
219 the 36 T<sub>0</sub> plantlets carried integral T-DNA, i.e., they were PCR positive for the presence  
220 of *cas9* and the gRNA-driving *OsU3* promoter in combination with at least one gRNA  
221 (Supplemental Table 4). Among them, four plants carried both gRNAs, providing the  
222 potential of generating insertion/deletion (INDEL) mutations at the target region  
223 (Supplemental Tables 1 and 4). Analysis of T<sub>0</sub> plants (Supplemental Table 5) revealed  
224 short INDELS as the most frequent result of site-directed mutagenesis, however, larger  
225 deletions were also detected (e.g. BG677E1A, BG677E1B and BG677E9B)  
226 (Supplemental Figure 2 and Supplemental Table 5). Sequencing of cloned PCR  
227 products revealed the chimeric state for most of the T<sub>0</sub> plants; except BG677E1B,  
228 representing a homozygous mutant carrying a 316 bp deletion in the collected leaf

229 sample, which showed a phenotype resembling the pre-stop TILLING mutants.  
230 Additionally, individual leaves from three independent chimeric T<sub>0</sub> mutants BG677E1E,  
231 2B and 2D, with *xantha* phenotype were confirmed to harbor frame-shift mutations and  
232 to lack the wild-type allele (Supplemental Figure 2 and Supplemental Table 5). We  
233 screened eight T<sub>1</sub> plants each from all of the 14 T<sub>0</sub> mutant families to see transmission  
234 of mutations through the germline. As expected, all homozygous and homogeneously  
235 biallelic mutant plants with frameshift mutations exhibited the *xantha*-to-green  
236 phenotype (Figure 3D & 3E and Supplemental Figure 2). It is worth noting that mutants  
237 with a lesion at target motif 1 showed a more severe phenotype than with lesions further  
238 downstream. This is not only manifested by the *xantha* leaf colour variation at early  
239 developmental stage (3 DAG), but also by a slower leaf development at later stages  
240 (e.g.10 DAG, Figure 3E). We named the mutant alleles in BG677E18A\_6 and  
241 BG677E5A\_21 *Hvcmf3-3* and *Hvcmf3-4*, respectively. The site-directed mutagenesis  
242 experiment consolidated our previous findings by TILLING that mutations in *HvCMF3*  
243 are causal for the *xantha*-to-green mutant phenotype. Furthermore, the observed  
244 position effect of the induced mutations implies that *HvCMF3* possesses (a) further  
245 essential functional region(s) in addition to the C-terminal CCT domain, which is  
246 expected to be removed or disrupted in the proteins of all respective induced mutants.

#### 247 **Identification of a Conserved Sequence Essential for HvCMF3 Function**

248 Protein alignments of 131 HvCMF3/HvCMF7 homologs from 66 angiosperm species  
249 revealed three highly conserved regions as well as further highly conserved AA  
250 residues in addition to the CCT domain near the C-terminus and the putative N-terminal  
251 cTP (Figure 4A). The *Hvcmf3-3* and *Hvcmf3-4* alleles differ potentially at protein level by  
252 a truncation of 17 AA, leading to a more severe phenotype in case of *Hvcmf3-3* (Figure  
253 3E & Supplemental Figure 3C). The missing peptide represents a conserved region with  
254 a postulated essential functional role in the protein (conserved region 2 in Figure 4A). In  
255 an attempt to test this hypothesis, we screened T<sub>1</sub> regenerants carrying both gRNAs  
256 with the expectation to observe large deletions extending over the identified conserved  
257 region. We identified four homozygous plants with in-frame deletion from mutant family  
258 BG677E9B, all exhibiting the *xantha*-to-green mutant phenotype; among them, one with

259 57 bp and another three with 51 bp deletions. Since none of the deletions affected the  
260 splicing site they are expected to result in 19 and 17 AA deletions, respectively, at  
261 protein level (Supplemental Figures 3 and 4). The mutant allele with a 51 bp deletion is  
262 designated as *Hvcmf3-5*. Two homozygous mutants (new allele *Hvcmf3-6*), carrying a  
263 19 bp deletion combined with a 34 bp insertion, were identified in family BG677E2C  
264 (Supplemental Figure 3). This mutation led to the substitution of seven AA at position  
265 290-296 (PAVPVKD) by 12 AA (HSTDATARTGSG) (Supplemental Figure 3D). The  
266 *Hvcmf3-6* mutant showed a green (wild-type) phenotype indicating that replacement of  
267 the seven original AA (PAVPVKD) did not affect HvCMF3 protein function. We  
268 performed conservation analysis for the *Hvcmf3-5* deleted region by comparing 116  
269 homologous sequences from 59 angiosperm species as described in Material and  
270 Methods. The first AA 'R' (i.e. arginine) is 100% conserved among all 116 sequences  
271 (Figure 4B). As revealed by the substitution mutant *Hvcmf3-6* in family BG677E2C, the  
272 C-terminal six AA (Figure 4B, positions 12-17) have no effect on HvCMF3 protein  
273 function. Therefore, the peptide of AA 279-289 (Figure 4B, positions 1-11) represents a  
274 previously unknown conserved functional region within the conserved domain 2. Neither  
275 the identified novel functional region nor the entire conserved domain 2 of HvCMF3 is  
276 reported in the NCBI's Conserved Domain Database (Marchler-Bauer et al., 2017).

### 277 **Reduced Chloroplast Ribosome Accumulation in *Hvcmf3* Mutants**

278 One of the most prominent characteristics of the *albostrians* mutant is the lack of  
279 ribosomes in plastids of albino leaves and albino sections of striped leaves (Hess et al.,  
280 1993; Li et al., 2019). We checked therefore whether mutation of *HvCMF3* has also an  
281 effect on plastid ribosomes. The accumulation of rRNA levels can be used as a proxy  
282 for ribosomal subunit accumulation (Walter et al., 2010). Thus, we quantified chloroplast  
283 and cytosolic rRNA fractions in light- and dark-grown seedlings of *Hvcmf3* mutants. Due  
284 to the *xantha*-to-green phenotype of young *Hvcmf3*, we compared with known barley  
285 *xantha* mutants, *xan-g44* and *xan-f68*, which contain only trace amounts of chlorophyll  
286 in their leaves due to defects in the magnesium chelatase (EC 6.6.1.1) subunits D and  
287 H, respectively (Olsson et al., 2004; Axelsson et al., 2006). This enzyme catalyzes the  
288 insertion of magnesium into protoporphyrin IX, the first unique step of the chlorophyll

289 biosynthetic pathway (Figures 5A & 5B). The relative abundance of chloroplast to  
290 cytosolic ribosomal subunits was determined by their ratios. Under light condition,  
291 *Hvcmf3* mutants as well as *xan-g44* and *xan-f68* have reduced amounts of both large  
292 (50S) and small subunits (30S) of the plastidal ribosome, as indicated by the lower  
293 23S:25S and 16S:25S ratios, respectively (Figures 5B & 5C). It should be noted that the  
294 23S rRNA contains so-called hidden breaks and is represented by two smaller RNAs,  
295 one of them at the position of the 18S rRNA and one below the 16S rRNA (Figure 5B)  
296 resulting in apparently higher amounts of 16S vs. 23S rRNAs (Figures 5B & 5E). The  
297 lower level of plastid rRNAs in light-grown *xan-g44* and *xan-f68* is a secondary effect of  
298 the low chlorophyll content and accumulation of chlorophyll precursors. Under these  
299 conditions, light leads to the production of ROS (Reactive Oxygen Species) in the  
300 plastids and consequently to the degradation of plastid rRNAs and low levels of plastid  
301 ribosomes (Willi et al., 2018). Interestingly, the dark-grown *Hvcmf3* mutant [only tested:  
302 *Hvcmf3-7* (Supplemental Figure 5D), exhibiting an albino-like phenotype] has very low  
303 plastid rRNA levels after growth in darkness indicating that the low content of plastid  
304 rRNA is not caused by light-induced degradation but a primary rather than a secondary  
305 effect of the mutation (Figures 5B to 5D). Consistent with the reduced amount of plastid  
306 rRNA, the chlorophyll content in the *Hvcmf3* mutants is significantly decreased  
307 compared to the wild type (Figure 5F and 5G). Mutant *Hvcmf3-1*, which exhibits the  
308 most severe phenotype, shows a higher chlorophyll *a:b* ratio than wild-type barley  
309 (Figure 5H). As PSII is enriched in chlorophyll *b* as compared to PSI, the higher  
310 chlorophyll *a:b* ratio may indicate that PSII is more severely affected than PSI in mutant  
311 *Hvcmf3-1* (Figure 5H). Nevertheless, the higher chlorophyll *a:b* ratio ameliorates during  
312 the greening process as evidenced by mutants *Hvcmf3-7* and *Hvcmf3-2*, suggesting  
313 that deficits in biogenesis of the photosynthetic complex can be compensated over time.

#### 314 **Mutation of *HvCMF3* Affects Photosynthesis**

315 Because of plastid ribosome deficiency (Figure 5) the *Hvcmf3* mutants potentially suffer  
316 from insufficient levels of RNA translation in chloroplasts. Since proteins of all  
317 components of the photosynthetic apparatus are being synthesized on plastid  
318 ribosomes, the efficiency of photosynthetic electron transport can serve as a highly

319 sensitive indicator of plastid translational capacity (Rogalski et al., 2008). PSII is known  
320 to require a particularly high translation capacity due to the constant requirement for  
321 repair synthesis of the D1 protein (Takahashi and Badger, 2011). To test this, we  
322 quantified photosynthesis-related traits in a series of *Hvcmf3* mutants with different  
323 severity of their pigment-deficiency phenotype by using a chlorophyll fluorescence  
324 imaging-based method integrated into an automated, conveyor-based phenotyping  
325 platform (Junker et al., 2014). Initially, 96 plants from 12 families, each with 8 replicates,  
326 were sown (Supplemental Figure 5, Supplemental Table 6). After filtering the non- or  
327 badly-germinated seeds and the chimeric seedlings, 60 plants were left for analysis  
328 including seven mutant and two wild-type families, respectively, each with four to eight  
329 replicates (Supplemental Table 6). Based on the severity of phenotype, the nine plant  
330 families were classified into three groups: Group I: wild type (Barke and Golden  
331 Promise); Group II: mutant families 4383-1 (*Hvcmf3-1*), BG677E2A\_2 (*Hvcmf3-7*) and  
332 BG677E5A\_21 (*Hvcmf3-4*); and Group III: BG677E5A\_19 (*Hvcmf3-8*), BG677E9B\_1  
333 (*Hvcmf3-9*), BG677E9B\_6 (*Hvcmf3-5*) and 13082-1 (*Hvcmf3-2*) (Supplemental Figure  
334 5D). Consistent with the reduced amount of plastid rRNAs in the *Hvcmf3* mutants, the  
335 PSII electron transport rate (ETR) is lower in the mutants compared to wild type.  
336 Moreover, the ETR of Group II mutants is significantly lower than of Group III (Figure  
337 6A). The quantification of PSII operating efficiency ( $\Phi_{PSII}$ ) of light-adapted plants  
338 revealed a lower PSII yield of the mutants compared to the wild type during early  
339 developmental stages (i.e. 6-14 DAS). Moreover, PSII operating efficiency of the two  
340 mutant groups also showed significant difference to each other (Figure 6B). Another  
341 parameter, qP, which represents the proportion of PSII reaction centers that are open,  
342 was significantly lower in the *Hvcmf3* mutants than in the wild type (Figure 6C). In line  
343 with the decreased  $\Phi_{PSII}$ , the maximum quantum efficiency of PSII ( $F_v/F_m$ ) was also  
344 significantly reduced in the *Hvcmf3* mutants (Figure 6D). In contrast to the lower PSII  
345 yield, a higher proportion of excitation energy in the *Hvcmf3* mutants was released as  
346 thermal dissipation compared to the wild type (Figure 6E). Group II mutants showed  
347 higher levels of non-photochemical quenching (NPQ) compared to Group III mutants  
348 (Figure 6E). The distinct PSII electron transport rate and PSII operating efficiency levels  
349 were also reflected by the different severity of the phenotype (Figure 6F). In line with the

350 reduced chlorophyll contents of the *Hvcmf3* mutants (Figure 5F-H), quantification of the  
351 plant coloration revealed that Group II mutants have higher yellow/green pixel ratio  
352 compared to Group III mutants. Meanwhile, Group II mutants exhibited smaller overall  
353 projected leaf area than Group III mutants as well as the wild type due to slower  
354 development (Figure 6F). Taken together, this data demonstrates that mutants of the  
355 gene *Hvcmf3* show a lower PSII activity which correlates with the reduced levels of  
356 plastid rRNA. Hence, mutants with the lowest plastid rRNA levels showed also the  
357 lowest PSII efficiency and the lowest PSII electron transport rate. This data supports our  
358 hypothesis of *Hvcmf3* mutants suffering from impaired chloroplast translation and that  
359 the observed impact on PSII (PS I has not been tested) is most likely a consequence of  
360 the plastid ribosome deficiency and not a direct effect of the mutations.

### 361 **Mutation of *HvCMF3* Affects Chloroplast Development and Grana Organization**

362 To clarify if the *HvCMF3* mutant related *xantha*-to-green phenotype is only manifested  
363 in physiological or also in anatomical changes, we analyzed leaf samples of the pre-  
364 stop TILLING mutants *Hvcmf3-1* and *Hvcmf3-2* at two developmental stages (3 and 10  
365 days after germination, DAG) by transmission electron microscopy (TEM)  
366 (Supplemental Figures 6 and 7). Cells of mutant *Hvcmf3-1* contained smaller  
367 chloroplasts than both the wild type and mutant *Hvcmf3-2* at 3 DAG and 10 DAG  
368 (Supplemental Figure 7). At 3 DAG chloroplast size of *Hvcmf3-2* was also reduced in  
369 comparison to wild type (Supplemental Figure 7A-F). At 10 DAG, chloroplast size in  
370 *Hvcmf3-2* was indistinguishable from wild type, while *Hvcmf3-1* still contained smaller  
371 chloroplasts (Supplemental Figure 7G-L). Compared with wild-type chloroplasts, both  
372 mutants showed a distinct difference in the structure of their grana, which (at least  
373 partially) were build up by a higher number of thylakoids with less condensed stacking  
374 at both developmental stages (Supplemental Figure 7). Based on quantitative  
375 assessments of chloroplast length, width and surface area, as well as grana number,  
376 the extent of grana stacking and distance between thylakoid membranes within the  
377 grana (Figure 7A & 7B), in both mutants, chloroplasts are smaller than wild-type leaves  
378 at 3 DAG as determined by the parameter 'surface area' (Figure 7C-E). Chloroplast size  
379 was also significantly different (Student's *t*-test,  $p = 6.4 \times 10^{-15}$ ) between *Hvcmf3-1* and

380 *Hvcmf3-2*, which correlates well with the more severe phenotype of *Hvcmf3-1* vs.  
381 *Hvcmf3-2* at 3 DAG (Figure 7C-E and Figure 2C). At 10 DAG, the development of  
382 chloroplast shape and morphology of mutant *Hvcmf3-1* remained delayed. In contrast,  
383 although chloroplast length of mutant *Hvcmf3-2* was still reduced if compared to the wild  
384 type, width and chloroplast surface area approached to wild-type level (Figure 7C-E).  
385 *Hvcmf3* mutations influenced also grana organization. At 3 DAG, chloroplasts of both  
386 TILLING mutants contained lower numbers of grana stacks (Figure 7F). In contrast to  
387 *Hvcmf3-2*, the number of grana was significantly reduced (Student's *t*-test,  $p = 6.8 \times 10^{-15}$ )  
388 <sup>15</sup>) in chloroplasts of *Hvcmf3-1*, also at 10 DAG (Figure 7F). The observed increased  
389 grana stacking in both mutants is a result of a higher number of thylakoids and of  
390 enhanced distances between thylakoid membranes within the stacks (Figure 7G & 7H,  
391 Supplemental Figure 8). In summary, the analyzed *Hvcmf3* mutants are affected in the  
392 physiological parameters of PSII efficiency and electron transport rate, which is  
393 underpinned by severe anatomical changes like smaller than wild-type chloroplasts  
394 containing a lower number of thylakoids and larger but loosely stacked grana.

### 395 **HvCMF3 Is Localized to the Chloroplast**

396 Similar to its ohnolog HvCMF7, which is allocated to barley chloroplasts (Li et al., 2019),  
397 *in silico* analysis by PredSL (Petsalaki et al., 2006) predicted the presence of a 95 AA  
398 chloroplast transit peptide at the HvCMF3 N-terminus (Supplemental Table 7). To test  
399 its function, we performed transient subcellular localization in barley epidermis of green  
400 fluorescent protein (GFP) fusion constructs with either the complete wild-type *HvCMF3*  
401 allele (HvCMF3:GFP) or the putative cTP of HvCMF3 only (cTP\_95AA\_HvCMF3:GFP)  
402 (Figure 8A and Supplemental Table 7). GFP fused to wild-type HvCMF3 accumulated in  
403 the plastids, co-localizing with the mCherry- labelled chloroplast allocation control  
404 (Figure 8D). GFP fluorescence was also observed in the nucleus (Figure 8D), however,  
405 at the same low level as was also observed for the GFP-only control (Figure 8B). A  
406 plastid allocation was also observed for the cTP\_95AA\_HvCMF3:GFP construct  
407 confirming the functionality of the predicted cTP at the N-terminal domain of HvCMF3  
408 (Figure 8E). We conclude that HvCMF3, similar to its ohnolog HvCMF7, is targeted to  
409 plastids.

## 410 ***Hvcmf3/Hvcmf7* Double Mutant Exhibits a Mixed *xantha*-albino Variegation** 411 **Phenotype**

412 Our results revealed that mutation of either of the ohnologs *HvCMF3* and *HvCMF7* is  
413 causing a chlorophyll-deficient phenotype. While *Hvcmf3* mutants exhibit a *xantha*-to-  
414 green recovery phenotype, *Hvcmf7* mutants show either a green-white variegation or a  
415 complete albino phenotype (Li et al., 2019). Both genes are essential for chloroplast  
416 development. *HvCMF3* mutants affect the amounts of plastid ribosomes, chloroplast  
417 size and the morphology of grana stacks while *HvCMF7* mutants do not show any  
418 development of chloroplasts and possess only proplastid-like ribosome-free plastids in  
419 their mesophyll cells. Homozygous *Hvcmf3-1/Hvcmf7-1* double mutants derived from  
420 crossing *Hvcmf7-1* x *Hvcmf3-1* showed a *xantha*-albino striped phenotype  
421 (Supplemental Figure 9D). If the more severe *Hvcmf7-2* mutant 6460-1 was used as a  
422 crossing parent (Li et al., 2019), the resulting homozygous double mutant *Hvcmf3-*  
423 *1/Hvcmf7-2* exhibited always the complete albino phenotype of *Hvcmf7-2*  
424 (Supplemental Figure 9E) indicating that the *HvCMF7* mutation has an epistatic effect  
425 on *HvCMF3*.

## 426 **DISCUSSION**

427 Plastid-encoded proteins are mainly involved in plastid gene transcription and  
428 translation or are playing a role in photosynthesis. Most of the genes needed for plastid  
429 functions and in particular for the development of chloroplasts and their photosynthetic  
430 apparatus are, however, encoded in the nuclear genome and are targeted to the  
431 plastid/chloroplast; including genes involved in chloroplast transcription, RNA  
432 processing, RNA stability, and translation (Börner et al., 2014; Pogson et al., 2015).  
433 Here we studied through induced mutagenesis the function of the gene *HvCMF3*.  
434 Similar to its ohnolog *HvCMF7* (Li et al., 2019), the gene *HvCMF3* codes for a nuclear  
435 protein that is involved in the biogenesis and/or stability of chloroplast ribosomes. Both  
436 *HvCMF3* and *HvCMF7* belong to the large family of genes coding for CCT proteins.  
437 While most of the intensively studied CCT domain proteins are involved in the regulation  
438 of nuclear gene transcription (Wenkel et al., 2006; Jang et al., 2008), *HvCMF7* and  
439 *HvCMF3* encoded proteins are allocated to the plastid. Mutations in both genes affect



440 plastid ribosomes. They either lead to the complete loss of chloroplast ribosomes  
441 resulting in an albino or green-white variegated phenotype in case of *HvCMF7* (Li et al.,  
442 2019), or, as in case of *HvCMF3*, show different degrees of chlorophyll and chloroplast  
443 ribosome deficiency, altered thylakoid morphology and reduced photosynthetic activity.

#### 444 **HvCMF3 Belongs to a Small Subfamily of CCT Domain Proteins**

445 *HvCMF3*, like *HvCMF7*, belongs to the gene family of CCT domain proteins. Numerous  
446 CCT-containing genes represent transcription factors that regulate gene expression in  
447 the nucleus through DNA-binding or by integration into DNA-binding protein complexes  
448 (Wenkel et al., 2006; Jang et al., 2008). Based on their domain structure, CCT proteins  
449 may be classified into COL (CONSTANS-LIKE) proteins having one or two zinc-finger  
450 B-Box domains, PRR (PSEUDO RESPONSE REGULATOR) proteins with a pseudo  
451 response regulator domain, and CMF (CCT MOTIF FAMILY) proteins containing only  
452 the CCT domain and lacking other known functional domains (Cockram et al., 2012).  
453 Both, *HvCMF3* and *HvCMF7*, carry only a single CCT domain and thus are assigned to  
454 the CMF family, which comprises nine genes in barley (Cockram et al., 2012). CMF  
455 genes are found likewise in gymnosperms and angiosperms, including the Arabidopsis  
456 homologs *AtCIA2* and *AtCIL* and are characterized by the presence of a putative N-  
457 terminal chloroplast transit peptide (cTP) but otherwise carry a single CCT motif (AA  
458 436-479 in *HvCMF3*) as the only annotated protein domain. In the present study as well  
459 as in our previous work on the characterization of *HvCMF7* (Li et al., 2019), we  
460 demonstrate that *HvCMF3* and *HvCMF7* share the conserved cTP and CCT regions,  
461 but, in contrast to other CMF domain proteins, carry additional, previously  
462 uncharacterized conserved regions, one of them proved to be essential for wild-type  
463 gene function in the present study. Based on the three more intensively studied  
464 genes/proteins of this CMF gene sub-family, we propose to differentiate them from other  
465 CMF genes by assigning them to a new CMF sub-family, the AAC proteins [for:  
466 ALBOSTRIANS/*HvCMF7* (Li et al., 2019), ALBOSTRIANS-LIKE/*HvCMF3*,  
467 CHLOROPLAST IMPORT APPARATUS 2/*AtCIA2* (Sun et al., 2009)]. According to the  
468 phylogenetic tree of CCT domain proteins (Cockram et al., 2012), these genes form a  
469 branch in a subclade of clade 2. Clade 2 comprises CMF genes/proteins characterized

470 by a specific position of an intron within the gene region coding for the CCT domain  
471 (Cockram et al., 2012). We postulate that AAC proteins have evolved to support the  
472 biogenesis and/or maintenance of chloroplast ribosomes in land plant species.

### 473 **HvCMF3 Potentially Plays a Role in Chloroplast Ribosome** 474 **Formation/Maintenance**

475 We observed a very low amount of chloroplast rRNA in leaves with low chlorophyll  
476 content in *Hvcmf3* mutants at early developmental stages. Both chlorophyll and  
477 chloroplast rRNA content improved with further development, however, without reaching  
478 wild-type level. A further striking feature of *HvCMF3* mutants are the drastic changes in  
479 the internal structures of chloroplasts with a decreased number of thylakoids and at the  
480 same time larger and more loosely stacked grana. Although we cannot rule out other  
481 functions of HvCMF3 yet, we regard the observed chloroplast rRNA deficiency as the  
482 most likely primary effect of the studied *Hvcmf3* mutants and all other observed effects  
483 of the mutations as being caused by the chloroplast translation deficiency. One reason  
484 for this conclusion is that similar phenotypes have previously been described for many  
485 mutants with reduced chloroplast translation. Although the phenotypes are different in  
486 details and highly variable depending on the type of mutated gene (there are many  
487 possibilities, e.g. genes for ribosomal proteins, tRNAs, rRNAs, translation factors, RNA  
488 processing factors and others), on the severity of the translation deficiency, on the  
489 phase of chloroplast development, when the translation deficiency starts to become  
490 effective, all mutants with impaired chloroplast translation show pigment deficiencies,  
491 lower performance of photosynthesis and altered thylakoid organization, often combined  
492 with retarded growth and delayed greening (Albrecht et al., 2006; Delannoy et al., 2009;  
493 Tiller and Bock, 2014; Liu et al., 2015; Kohler et al., 2016; Aryamanesh et al., 2017;  
494 Zhang et al., 2017). Another reason for proposing the ribosome deficiency as primary  
495 effect is that pigment deficiency, altered thylakoid organization or impaired  
496 photosynthesis does not cause chloroplast ribosome deficiencies, while the opposite  
497 occurs and can be explained by the function of chloroplast translation. Chloroplast  
498 genes encode essential components of the photosynthetic apparatus including subunits  
499 of PSI, PSII, Cytb<sub>6</sub>f, ATP synthase and NDH, i.e., these proteins are synthesized on

500 chloroplast ribosomes. Thus, a reduced amount of chloroplast ribosomes, as observed  
501 in *HvCMF3* mutants, will negatively affect photosynthesis and will also have effects on  
502 thylakoid architecture. In this context it is interesting to note that the formation of large  
503 grana was observed in a barley mutant lacking PSII reaction centers (J. Simpson et al.,  
504 1989) and in Arabidopsis plants treated with the chloroplast translation inhibitor  
505 lincomycin (Belgio et al., 2015). It is well established that large grana are formed under  
506 low or red light vs. high light or blue light (Mostowska, 1986). An interruption of the  
507 electron transport between photosystem II and photosystem I triggers also the formation  
508 of large thylakoid stacks (Meier and K. Lichtenthaler, 1981; Jia et al., 2012). Large  
509 grana have been further described in mutants with impaired starch formation (Hausler et  
510 al., 2009). Recent studies point to phosphorylation levels of PSII and LHCII and/or the  
511 degree of oligomerization of the thylakoid curvature protein family as regulators of the  
512 dynamic changes in thylakoid stacking (Armbruster et al., 2013; Pietrzykowska et al.,  
513 2014; Puthiyaveetil et al., 2017; Wood et al., 2018; Wood et al., 2019). *HvCMF3*  
514 encodes a chloroplast-localized CMF protein. To our knowledge, no evidence has yet  
515 been reported for any interaction of CMF proteins with kinases or phosphatases  
516 involved in phosphorylation/dephosphorylation of thylakoid components, such as LHCII-  
517 specific phosphatase PPH1, PSII-specific phosphatase PBCP, protein kinases STN7  
518 and STN8 (Fristedt et al., 2009; Pribil et al., 2010; Samol et al., 2012), or thylakoid  
519 curvator proteins (Armbruster et al., 2013). Also nuclear genes coding for proteins with  
520 roles in photosynthesis, thylakoid formation, and pigment synthesis are likely affected in  
521 their expression in chloroplast ribosome deficient mutants, due to plastid-to-nucleus  
522 retrograde signaling (Kleine and Leister, 2016; Borner, 2017; de Souza et al., 2017;  
523 Hernandez-Verdeja and Strand, 2018). Chloroplast ribosome deficiency as the reason  
524 of our phenotypic observations *Hvcmf3* plants is also supported by the fact that severity  
525 of ribosome deficiency is correlated with increasingly drastic effects on chlorophyll  
526 content, PSII efficiency, and grana morphology.

527 We conclude that *HvCMF3* plays a role in the biogenesis and/or maintenance of plastid  
528 ribosomes. Its localization to plastids fits to the proposed role. Thus, *HvCMF3* might  
529 have a similar function as *HvCMF7*. The functions of *HvCMF3* and *HvCMF7* are,  
530 however, not identical as can expected when two ohnologs have been retained in the

531 genome for a period of about 70 million years since the WGD they originate from. We  
532 deduce non-identical functions for *HvCMF3* and *HvCMF7* from our observation that the  
533 genes cannot substitute for each other in mutants. Moreover, the mutants of *HvCMF3*  
534 and *HvCMF7* have clearly different phenotypes. While mutation of *HvCMF7* results in  
535 an albino phenotype, the lack of ribosomes and, consequently, to a complete stop of  
536 chloroplast development, *Hvcmf3* mutants show a *xantha*-to-green phenotype, possess  
537 plastid ribosomes, although distinctly reduced in their number, and show a retarded  
538 chloroplast development. Crossing the two mutants revealed an epistatic effect of  
539 *HvCMF7* on *HvCMF3*. This, however, is not surprising, if the function of both proteins is  
540 needed to reach the normal number of ribosomes and the malfunction of one alone  
541 (*HvCMF7*) is already sufficient to cause the complete loss of ribosomes and the  
542 complete stop of chloroplast development, that is, more effect is not possible.

543 With this initial characterization of *HvCMF3*, it is possible to compare the function of  
544 three AAC proteins, ALBOSTRIANS, ALBOSTRIANS-LIKE and CHLOROPLAST  
545 IMPORT APPARATUS 2. All three share a very similar structure with a putative N-  
546 terminal cTP, several conserved domains of unknown function (the functional  
547 importance of one conserved region has been demonstrated in the present study),  
548 additional conserved amino acids and the CCT domain near the C terminus. The exact  
549 roles of those conserved regions including the CCT domain have still to be determined.  
550 The function of the cTP domain as mediator of the transport of the protein into plastids  
551 has been confirmed for *HvCMF3* (this report) and *HvCMF7* (Li et al., 2019). Since a  
552 putative cTP domain is also present in the *Amborella* homolog and in the homologous  
553 proteins of gymnosperms, one might speculate about a chloroplast localization of the  
554 ancestor of the AAC proteins. However, the example of the Arabidopsis protein AtCIA2,  
555 reported to be a nuclear transcription factor (Sun et al., 2001) (Sun et al., 2009) shows  
556 that one has to be cautious about speculations. Even though AtCIA2 is a nuclear protein  
557 and *HvCMF3* and *HvCMF7* are chloroplast proteins, all three play roles in chloroplast  
558 development. Since AtCIA2 is reported to be involved in the regulation of transcription  
559 of nuclear genes coding for chloroplast ribosomal proteins and for proteins of the  
560 chloroplast protein import machinery, all three AAC proteins are essential to provide

561 chloroplasts with an adequate number of ribosomes. Thus, the AAC family might be a  
562 new source of proteins with essential functions in chloroplast development.

## 563 MATERIALS AND METHODS

### 564 Plant Material and Growth Conditions

565 M<sub>3</sub> TILLING families carrying single nucleotide polymorphisms (SNP) causing non-  
566 synonymous or pre-stop mutations were selected for phenotyping. For each family 16  
567 plants were characterized phenotypically and further genotyped for the respective  
568 *HvCMF3* alleles via either Sanger sequencing or CAPS assay. The barley cultivar  
569 'Golden Promise' was used for generation of the transgenic lines. The primary T<sub>0</sub>  
570 plantlets were grown in a climate chamber with long day condition (16h light/8h dark;  
571 constant temperature 22°C) until reaching the third-leaf stage and then transferred to a  
572 greenhouse with the same photoperiod regime but variable day/night temperature  
573 20°C/15°C. Supplemental light (300 μmol photons m<sup>-2</sup> s<sup>-1</sup>) was used to extend the  
574 natural light with incandescent lamps (SON-T Agro 400; MASSIVE-GROW, Bochum,  
575 Germany). All TILLING mutants and *xantha* mutants were grown under the same  
576 greenhouse condition as the transgenic lines. For dark treatment, grains were  
577 germinated within a carton box wrapped with aluminum foil under the greenhouse  
578 condition.

579 For automated phenotyping, after 24 hours imbibition on water-soaked filter paper,  
580 germinated grains were transferred to 10 cm pot (diameter) filled with a mixture of 85%  
581 (v) red substrate 1 (Klasmann-Deilmann GmbH, Geeste, Germany) and 15% (v) sand.  
582 All the plants were grown under controlled conditions at 20/16°C under a circadian  
583 rhythm 16-h light/8-h darkness, 70% relative humidity, photosynthetic active radiation  
584 (PAR) of 300 μmol photons m<sup>-2</sup> s<sup>-1</sup> in the growth chamber. In total, 96 plants including  
585 12 genotypes each with 8 replicates were phenotypically evaluated under the  
586 LemnaTec Scanalyzer system (LemnaTec AG, Aachen, Germany) at the IPK  
587 Gatersleben. The 12 genotypes consist of two TILLING mutant lines 4383-1 (*Hvcmf3-1*;  
588 M5 lines) and 13082-1 (*Hvcmf3-2*; M6 lines); eight Cas9-induced T2 mutant lines  
589 BG677E1B\_3, BG677E2A\_2 (*Hvcmf3-7*), BG677E5A\_2, BG677E5A\_21 (*Hvcmf3-4*),

590 BG677E5A\_19 (*Hvcmf3-8*), BG677E9B\_1 (*Hvcmf3-9*), BG677E9B\_6 (*Hvcmf3-5*) and  
591 BG677E18A\_6 (Supplemental Figure 5), and the two wild-type cultivars ‘Barke’ and  
592 ‘Golden Promise’, which represent the genetic background of the TILLING and Cas9-  
593 induced mutants, respectively.

## 594 **Phylogenetic Analysis**

595 The barley ALBOSTRIANS protein sequence was used as BLASTP query to retrieve  
596 homologs from other species on NCBI and phytozome (Goodstein et al., 2012)  
597 databases. Phylogenetic analysis was performed using MEGA6 (Tamura et al., 2013)  
598 following the protocol of Hall (Hall, 2013). The alignment method MUSCLE was chosen  
599 to build the alignment. Next, phylogenetic tree construction was performed based on the  
600 Maximum Likelihood (ML) statistical method. The Bootstrap method with 1,000  
601 Bootstrap Replications was set to estimate reliability of the phylogenetic tree. The  
602 Jones-Taylor-Thomton (JTT) model and Gamma Distributed (G) were selected for  
603 options Model/Method and Rates among Sites, respectively. The gaps were treated with  
604 partial deletion option i.e., all positions containing gaps and missing data less than 95%  
605 coverage were eliminated. There were a total of 264 positions in the final dataset. The  
606 phylogenetic tree was visualized with iTOL (Letunic and Bork, 2016).

## 607 **TILLING Screening**

608 In an effort to identify *HvCMF3* mutated alleles, an EMS-induced TILLING population  
609 (Gottwald et al., 2009) was screened by placing three primer pairs to cover the coding  
610 regions of the *HvCMF3* gene (Supplemental Tables 1 and 2) and mutations were  
611 detected as described previously (Li et al., 2019). Phenotypic and genotypic analyses  
612 were performed with the M<sub>3</sub> progeny of the identified M<sub>2</sub> families, which carried non-  
613 synonymous or pre-stop mutations. The two pre-stop TILLING families, 4383-1 and  
614 13082-1, were further propagated and analyzed in M<sub>4</sub> and M<sub>5</sub> generations to confirm the  
615 linkage between the genotype of the *HvCMF3* locus and the observed phenotype.

## 616 **Site-directed Mutagenesis Using Cas9 Endonuclease**

617 Targeted mutagenesis using Cas9 endonuclease was adopted to generate mutations in  
618 the *HvCMF3* gene. In the first step, the 'KNOCKIN' tool on Deskgen Cloud was chosen  
619 for guide RNA (gRNA) design (<https://www.deskgen.com/landing/cloud.html>). The  
620 coding sequence of *HvCMF3* was used as query and two proper gRNA target motifs  
621 were selected surrounding the position of the pre-stop mutation of TILLING mutant  
622 4383-1. The predicted gRNA activity scored 50 and 58 for target motif 1 (3'-  
623 GGGAGTTCGCCGCCCTGCTGCTG-5') and target motif 2 (3'-  
624 GGCCACTTCCTGTAGTGCCAGTG-5'), respectively. Both target motifs were located at  
625 the antisense strand and the underlined nucleotides represent the protospacer adjacent  
626 motif (PAM). Next, the *HvCMF3*-specific protospacer sequences were synthesized by  
627 introducing proper overhangs to facilitate downstream cloning steps (gRNA1 forward:  
628 5'-GGCGTCGTCGTCCCGCCGCTTGA-3' and reverse: 5'-  
629 AAACTCAAGCGGCGGGACGACGAC-3'; gRNA2 forward: 5'-  
630 GGCGTGACCGTGATGTCCTTCAC-3' and reverse: 5'-  
631 AAACGTGAAGGACATCACGGTCAC-3'). The protospacer sequence (i.e., annealed  
632 oligonucleotides) was then cloned into vector pSH91 (Budhagatapalli et al., 2016). The  
633 derived vector was designated as pGH379-7 for gRNA1 and pGH380-12 for gRNA2.  
634 Subsequently, the expression cassette of pGH379-7 and pGH380-12 was transferred  
635 into the binary vector p6i-d35S-TE9 (DNA-Cloning-Service, Hamburg, Germany)  
636 through *Sfi*I cloning sites. The resulting plasmids pGH449-2 and pGH450-6 were co-  
637 transformed into barley cv. 'Golden Promise' following a previously established protocol  
638 (Hensel et al., 2009). To check for T-DNA integration in regenerated T<sub>0</sub> plantlets, PCR  
639 primers targeting the *hpt* or *cas9* gene and the *OsU3* promoter were used in PCR  
640 reactions (Supplemental Table 1). Besides, presence/absence of gRNA1 and/or gRNA2  
641 of each plant were verified by protospacer-specific primers (Supplemental Table 1).  
642 Primer pair *HvCMF3\_F2/R2* was employed to detect mutations for the pre-selected  
643 target regions of *HvCMF3*. Mutations carried by the chimeric T<sub>0</sub> plants were further  
644 characterized by sub-cloning PCR products using the CloneJET PCR cloning Kit  
645 (Thermo Scientific, Wilmington, USA); at least eight colonies were sequenced. T<sub>0</sub> plants  
646 with mutations were further propagated to T<sub>1</sub> generation. In analogy to analysis of the T<sub>0</sub>  
647 plants, inheritance of the mutations was checked for T<sub>1</sub> progenies. Additionally, T<sub>1</sub>

648 plants were phenotyped in terms of its leaf colour variation during developmental stages  
649 of the initial three leaves.

### 650 ***HvCMF3* Gene Structure Analysis**

651 The structure of the *HvCMF3* gene was determined by analysis of its cDNA. Total RNA  
652 was extracted from leaf material of a 3-day-old barley seedling (cv. Barke) using the  
653 Trizol reagent (Thermo Scientific, Wilmington, USA) following the manufacturer's  
654 instructions. Concentration of the RNA is measured by help of a NanoDrop 1000  
655 spectrophotometer (Thermo Scientific, Wilmington, USA) and further diluted to 1 µg/µL  
656 for downstream application. The prepared RNA was first treated with RNase-free  
657 DNase I (Fermentas, St. Leon-Rot, Germany) to remove potential DNA contamination;  
658 then used for cDNA synthesis applying the SuperScript™ III First-Strand Synthesis  
659 System Kit (Thermo Scientific, Wilmington, USA) following the manufacturer's  
660 instructions. Next, RT-PCR was performed using primers that cover the *HvCMF3* coding  
661 regions (Supplemental Table 1) as previously described (Li et al., 2019). RT-PCR  
662 products were purified using the NucleoFast® 96 PCR Kit (Macherey-Nagel, Düren,  
663 Germany) and Sanger sequenced on an ABI 3730 XL platform (Life Technologies  
664 GmbH, Darmstadt, Germany). The *HvCMF3* exon-intron-structure was revealed by  
665 alignment of the coding sequence to the corresponding genomic region.

### 666 **CAPS Assay**

667 One CAPS (Cleaved Amplified Polymorphic Sequences) marker was developed for  
668 genotyping the two *HvCMF3* pre-stop TILLING mutants, respectively. Briefly, PCR  
669 reactions were performed as described earlier (Li et al., 2019) with minor changes, i.e.,  
670 the annealing temperature for the touch-down profile was 62°C to 57°C instead of 65°C  
671 to 60°C. The SNP carrying by the PCR amplicon was converted into a CAPS marker by  
672 help of the SNP2CAPS software (Thiel et al., 2004) for the selection of the proper  
673 restriction enzyme (Supplemental Table 3). Differentiation of the genotypes was  
674 achieved by the distinct digestion patterns resolved on 1.5% (w/v) agarose gels  
675 (Invitrogen GmbH, Darmstadt, Germany).

### 676 **Identification of Conserved Sequence Regions**



677 For conservation analysis, all identified 131 *HvCMF3*-homologous sequences were  
678 aligned using MEGA6 with the MUSCEL method (Tamura et al., 2013). During the  
679 subsequent sequence validation process, the aligned sequences were manually edited  
680 by removing wrongly predicted sequence regions and filling gaps. Conservation of the  
681 resulting 675 aligned positions was displayed by the online tool WebLogo (Crooks et al.,  
682 2004).

683 For conservation analysis of the novel functional region identified in this study, the  
684 conserved region 2 was extracted from the above aligned file and then re-aligned in  
685 MEGA6 with the MUSCEL method (Tamura et al., 2013). Next, sequences with unequal  
686 length compared to the prominent motif (17 AA in length) were eliminated. Finally, 116  
687 sequences from 59 species with a consistent 17 AA length were obtained. Peptide  
688 conservation was visualized using the online tool MEME (Bailey et al., 2009).

### 689 **Ribosomal RNA Analysis**

690 RNA isolation and determination of RNA concentration were performed as previously  
691 described (Li et al., 2019). In short, an Agilent 4200 TapeStation System (Agilent, Santa  
692 Clara, USA) was adopted for analysis of rRNA. Initially, the concentration of the RNA  
693 was determined by help of a Qubit<sup>®</sup> 2.0 Fluorometer (Life Technologies GmbH,  
694 Darmstadt, Germany) according to manufacturer's instructions. RNA samples were  
695 further diluted within a quantitative range of 1 - 10 ng/ $\mu$ L. RNA quality and quantity was  
696 then measured using an Agilent High Sensitivity RNA ScreenTape following the  
697 manufacturer's manual (Agilent, Santa Clara, USA).

### 698 **Chlorophyll Content Measurement**

699 Leaf material was collected from primary leaves of 10-day-old seedlings. Samples were  
700 weighted and then frozen in liquid nitrogen. After homogenization using Mixer Mill  
701 MM400 (Retsch GmbH, Haan, Germany), 1.5 mL of *N,N*-Dimethylformamide (DMF)  
702 was added to each sample, followed by mixing on an overhead shaker (Keison  
703 Products, Chelmsford, England) for 30 min. Subsequently, the supernatant obtained  
704 after centrifugation (14,000x g for 10 min, room temperature) was transferred to a new 2  
705 mL Eppendorf tube. Chlorophyll content measurement and calculation were performed

706 according to (J.W.A Porra et al., 1989). In brief, cuvette-based measurement (cuvette  
707 with 1 mm path length) was conducted by help of the Spectramax Plus  
708 spectrophotometer (GENEO BioTechProducts GmbH, Germany). Chlorophyll content of  
709 *a* and *b* was calculated by the following equation: chlorophyll *a* =  $13.43(A^{663.8} - A^{750}) -$   
710  $3.47(A^{646.8} - A^{750})$ ; chlorophyll *b* =  $22.90(A^{646.8} - A^{750}) - 5.38(A^{663.8} - A^{750})$ .

### 711 **High-throughput Automated, Imaging-based Phenotyping**

712 Phenotyping by RGB (Red Green Blue, i.e., visible light) and static fluorescence  
713 imaging as described in (Junker et al., 2014) started at 5 DAS and was thereafter  
714 performed daily until 14 DAS. Kinetic chlorophyll fluorescence measurements were  
715 performed using the integrated FluorCam imaging fluorimeter (Photon Systems  
716 Instruments, Brno, Czech Republic). Chlorophyll fluorescence kinetics was measured  
717 following a protocol optimized for the automated high throughput imaging system  
718 (Tschiersch et al., 2017). Measurement of PSII operating efficiency ( $\Phi_{PSII}$ ) and electron  
719 transport rate (ETR) were performed with light adapted plants. For adaptation, plants  
720 were incubated in the adaptation tunnel for 5 min followed by 1 min illumination after  
721 moving into the chlorophyll fluorescence imaging (CFI) chamber with equal light  
722 intensity of  $300 \mu\text{mol photons m}^{-2} \text{s}^{-1}$ . Subsequently, a saturating flash with PAR  
723 (photosynthetic active radiation) intensity  $4100 \mu\text{mol photons m}^{-2} \text{s}^{-1}$  for a period of 800  
724 ms was applied to induce maximal chlorophyll fluorescence ( $F_m'$ ). The steady state  
725 fluorescence emission ( $F'$ ) and  $F_m'$  were recorded by the FluorCam imaging module.  
726 The formula  $\Phi_{PSII} = (F_m' - F') / F_m'$  was used to calculate effective quantum yield of  
727 photochemical energy conversion in PSII. The electron transport rate (ETR) was  
728 calculated as  $\text{ETR} = \Phi_{PSII} \times \text{PAR} \times 0.5 \times \text{ABS}$  where PAR equals 300 in this study, 0.5  
729 is a factor that accounts for the fraction of excitation energy distributed to PSII, and the  
730 factor *ABS* (Absorbance) represents the leaf absorbance as determined by the near-  
731 infrared (NIR) and red light (RED) sources. It is calculated by the equation  $\text{ABS} = (\text{NIR} -$   
732  $\text{RED}) / (\text{NIR} + \text{RED})$ . The PSII operating efficiency was measured at the time points 6, 7,  
733 8, 9, 12, and 14 DAS.

734 Quenching parameters were determined during the night when plants were dark-  
735 adapted in the growth chamber for at least 2 hours. The minimal chlorophyll

736 fluorescence intensity ( $F_0$ ) was measured after moving into the CFI chamber and the  
737 maximal chlorophyll fluorescence intensity ( $F_m$ ) was induced by application of a  
738 saturating flash ( $4100 \mu\text{mol photons m}^{-2} \text{s}^{-1}$ ) for 800 ms. After 10 s in darkness, plants  
739 were illuminated with actinic light ( $300 \mu\text{mol photons m}^{-2} \text{s}^{-1}$ ) for 4 min. During the  
740 quenching procedure, a saturating flash was applied for 9 s after application of the  
741 actinic light and repeated 6 times with an interval of 46 s. The values of maximal  
742 chlorophyll fluorescence intensity  $F_m'$  and steady state fluorescence emission  $F'$  were  
743 collected from the last saturating flash when the plants were light-adapted. Non-  
744 photochemical quenching (NPQ) was calculated using the equation  $\text{NPQ} = (F_m/F_m') - 1$ ;  
745 and photochemical quenching (qP) using the equation  $\text{qP} = (F_m' - F') / (F_m' - F_0')$   
746 (Supplemental Dataset 3). The distance between the FluorCam panels and plants was  
747 set to 27 cm. The quenching experiment was performed at 6, 8, 9, 12, and 14 DAS.

748 From daily RGB and static fluorescence imaging, amongst others the traits 'projected  
749 leaf area' and yellow to green pixel ratio were extracted after automated image pre-  
750 processing and segmentation using the Integrated Analysis Platform (Klukas et al.,  
751 2014). Both parameters were measured based on images acquired from the side view.  
752 These traits are a proxy for plant growth dynamics during the phenotyping experiment  
753 and the dynamics of plant coloration and the *xantha*-to-green phenotype during early  
754 seedling development, respectively. To comply with the FAIR principles of data  
755 management, the phenotyping procedures and dataset have been described using  
756 standardized metadata formats (Rocca-Serra et al., 2010) following the  
757 recommendations of the Minimum Information About a Plant Phenotyping Experiment  
758 version 1.1 (MIAPPE v1.1) recommendations (Cwiek-Kupczynska et al., 2016) and the  
759 entire dataset comprising raw and result image data as well as derived phenotypic trait  
760 tables and metadata descriptions was uploaded to the Plant Genomics and Phenomics  
761 repository (Arend et al., 2016) using the e!DAL data publication pipeline (Arend et al.,  
762 2014). The exact value for all the measured traits at different time points is summarized  
763 in Supplemental Dataset 3, and  $p$  values of the *Student's t-test* is summarized in  
764 Supplemental Dataset 4.

## 765 **Chloroplast Ultrastructural Analysis**

766 Primary leaves of two developmental stages (3 and 10 days after germination) were  
767 collected from wild type Barke, mutant 4383-1 and mutant 13082-1. For comparative  
768 ultrastructural analysis, leaf cuttings of a size of 1x2 mm from corresponding regions  
769 (Supplemental Figure 6) of three biological replicates were used for combined  
770 conventional and microwave assisted chemical fixation, substitution and resin  
771 embedding as defined in the given protocol (Supplemental Table 8). Sectioning and  
772 transmission electron microscopy analysis was performed as described (Daghma et al.,  
773 2011).

### 774 **Subcellular Localization**

775 Two constructs, HvCMF3:GFP and cTP\_95AA\_HvCMF3:GFP, were used to investigate  
776 the subcellular localization of HvCMF3. For HvCMF3:GFP, the coding sequence of cv.  
777 'Barke' was amplified using cDNA as a template employing the manually designed  
778 primer pair HvCMF3\_SC\_F/HvCMF3\_SC\_R with *SpeI* and *HindIII* restriction sites  
779 introduced at the 5' and 3' end, respectively. Similarly, primer pair  
780 HvCMF3\_cTP\_95AA\_F/HvCMF3\_cTP\_95AA\_R with restriction sites as mentioned  
781 above was used to amplify the HvCMF3 cTP predicted by the online tool PredSL  
782 (Petsalaki et al., 2006) (Supplemental Tables 1 and 7). The derived PCR fragments  
783 were separately inserted into vector pSB179 (Li et al., 2019). The resulting vectors  
784 HvCMF3:GFP and cTP\_95AA\_HvCMF3:GFP were investigated for transient expression  
785 in barley epidermal cells via biolistic assay by using the PDS-1000/He Hepta™ device  
786 (Bio-Rad, Munich, Germany). A plastid marker pt-rk CD3-999 containing the *mCherry*  
787 gene driven by the doubled enhanced *CaMV 35S* promoter was adopted for particle co-  
788 bombardment with the *HvCMF3* constructs (Plastid marker TAIR link:  
789 <https://www.arabidopsis.org/servlets/TairObject?type=stock&id=3001623338>). Four to  
790 six primary leaves were harvested from 7-day-old seedlings and placed on 1% Agar  
791 supplemented with 20 µg/mL benzimidazol and 10 µg/mL chloramphenicol. Gold  
792 suspension was prepared by suspending 30 mg gold particles (diameter = 1.0 µm, Bio-  
793 Rad, Munich, Germany) in 1 mL 100% ethanol. For each shooting, 50 µL of gold  
794 suspension was taken and washed three times with 100 µL ddH<sub>2</sub>O followed by  
795 suspension in 25 µL ddH<sub>2</sub>O. Then, gold particles were coated with 5 µL of plasmids (2.5

796  $\mu\text{L}$  each of HvCMF3 construct and plastid marker; both with a concentration of  $1 \mu\text{g}/\mu\text{L}$ )  
797 in the presence of  $25 \mu\text{L}$   $25 \text{ mM}$   $\text{CaCl}_2$  and  $10 \mu\text{L}$   $0.1 \text{ M}$  spermidine under vortexing for  
798 2 minutes. After centrifugation, the plasmid-gold-pellet was washed twice with 100%  
799 ethanol and suspended in  $60 \mu\text{L}$  100% ethanol. A total of  $5 \mu\text{L}$  of plasmids-coated gold  
800 suspension was loaded onto each of seven macro-carriers pre-washed with 100%  
801 ethanol and dried under a fume hood. Plasmids pSB179 and pt-rk CD3-999 were  
802 bombarded individually with 1100 psi acceleration pressure and 27 inch Hg vacuum  
803 pressure in controls for distribution pattern of GFP and mCherry fluorescence,  
804 respectively. The biolistically transformed leaves were incubated at room temperature  
805 for 24 hours followed by detection of the fluorescent signals by help of a Zeiss LSM780  
806 confocal laser scanning microscope (Carl Zeiss, Jena, Germany). Green fluorescence  
807 of GFP was visualized by using the 488 nm excitation laser line with a manually defined  
808 490-530 bandpass; mCherry signals were detected by the 561 nm excitation laser in  
809 combination with a 580-620 nm bandpass.

## 810 **Crossing Experiments**

811 Allelism tests between *Hvcmf3-1* and *Hvcmf3-2* were performed by crossing TILLING  
812 mutant 4383-1 (maternal parent) with TILLING mutant 13082-1 (pollen donor).  $F_1$   
813 hybrids carrying both mutant alleles were phenotypically characterized during the first to  
814 three leaf stages. Generation of *Hvcmf3/Hvcmf7* double mutants was achieved by  
815 crossing TILLING mutant 4383-1 as pollen donor with heterozygous *albostrians*  
816 TILLING mutant 6460-1 and the original *albostrians* mutant M4205, respectively.  $F_1$   
817 plants heterozygous for both *HvCMF3* and *HvCMF7* loci were kept and *Hvcmf3/Hvcmf7*  
818 double mutants were further selected in  $F_2$  generation.

## 819 **SUPPLEMENTAL DATA**

820 **Supplemental Figure 1:** Phenotype of TILLING mutant *Hvcmf3-1* during development.

821 **Supplemental Figure 2:** Summary of Cas9-induced mutations.

822 **Supplemental Figure 3:** Identification of novel functional region of HvCMF3.

823 **Supplemental Figure 4:** *HvCMF3* cDNA analysis of  $T_1$  homozygous mutants of family  
824 BG677E9B.

825 **Supplemental Figure 5:** Phenotypes of selected *Hvcmf3* mutants and respective wild-  
826 type plants.

827 **Supplemental Figure 6:** Sample collection for ultrastructural analysis.

828 **Supplemental Figure 7:** Chloroplast ultrastructural analysis for *Hvcmf3* mutants and  
829 wild-type plants.

830 **Supplemental Figure 8:** Quantification of thylakoid numbers.

831 **Supplemental Figure 9.** Phenotype of double mutant *Hvcmf3/Hvcmf7*.

832 **Supplemental Table 1.** Primers used in this study.

833 **Supplemental Table 2.** Summary of identified TILLING mutations of *HvCMF3*.

834 **Supplemental Table 3.** Markers used for analysis of *Hvcmf3* pre-stop TILLING  
835 mutants.

836 **Supplemental Table 4.** PCR screening of T<sub>0</sub> plants for presence and integrity of T-  
837 DNA.

838 **Supplemental Table 5.** Genotyping of T<sub>0</sub> regenerants.

839 **Supplemental Table 6.** List of genotypes used for automated phenotyping.

840 **Supplemental Table 7.** *In silico* prediction of subcellular localization of HvCMF3.

841 **Supplemental Table 8.** Sample preparation for transmission electron microscopy.

842 **Supplemental Dataset 1.** Orthologs of *HvASL* and *HvAST* in monocots and dicots.

843 **Supplemental Dataset 2.** *In silico* cTP prediction of *HvAST/HvASL* homologous genes.

844 **Supplemental Dataset 3:** Summary of the photosynthetic and developmental related  
845 traits measured using the automated phenotyping platform.

846 **Supplemental Dataset 4:** *Student's t-test* for the phenotyping experiment.

#### 847 **DATA AVAILABILITY:**

848 The complete phenomics dataset (images, trait values and metadata) has been  
849 deposited in e!DAL - The Plant Genomics & Phenomics Research Data Repository. Link  
850 to the data: <https://doi.ipk-gatersleben.de/DOI/a65bca88-dced-493a-bb70-9952e8864672/325b7404-4ccc-40ea-a301-a9f7e4c48219/2/1847940088>.  
851

#### 852 **ACKNOWLEDGEMENT**

853 The authors gratefully acknowledge technical support from Mary Ziems and Heike  
854 Harms for the crossing experiments; Jacqueline Pohl for screening of the TILLING  
855 population; Susanne König for Sanger sequencing; Sabine Sommerfeld for barley  
856 transformation; Marion Benecke and Kirsten Hoffie for microscopy; Gunda Wehrstedt  
857 and Ingo Muecke for their support in the LemnaTec experiment; Heike Mueller for photo  
858 documentations of plants; and Mats Hansson (Lund University) for providing grains of  
859 the *xantha* mutants of barley. The work was supported by the Deutsche  
860 Forschungsgemeinschaft DFG grant STE 1102/13-1 to N.S. and grant KU 1252/8-1 to  
861 J.K.

## 862 AUTHOR CONTRIBUTIONS

863 M.L., N.S., T.B. and J.K. conceived the study. M.L., G.H., M.M., A.J. and H.T performed  
864 experiments. A.J and D.A contributed phenotyping data submission. M.L. analyzed  
865 data. M.L., N.S and T.B wrote the paper.

## 866 REFERENCES

- 867 **Albrecht, V., Ingenfeld, A., and Apel, K.** (2006). Characterization of the snowy  
868 cotyledon 1 mutant of *Arabidopsis thaliana*: the impact of chloroplast elongation  
869 factor G on chloroplast development and plant vitality. *Plant Mol. Biol.* **60**, 507-  
870 518.
- 871 **Arend, D., Junker, A., Scholz, U., Schuler, D., Wylie, J., and Lange, M.** (2016). PGP  
872 repository: a plant phenomics and genomics data publication infrastructure.  
873 *Database (Oxford)* **2016**.
- 874 **Arend, D., Lange, M., Chen, J., Colmsee, C., Flemming, S., Hecht, D., and Scholz,  
875 U.** (2014). e!DAL--a framework to store, share and publish research data. *BMC*  
876 *Bioinformatics* **15**, 214.
- 877 **Armbruster, U., Labs, M., Pribil, M., Viola, S., Xu, W., Scharfenberg, M., Hertle,  
878 A.P., Rojahn, U., Jensen, P.E., Rappaport, F., Joliot, P., Dormann, P.,  
879 Wanner, G., and Leister, D.** (2013). *Arabidopsis* CURVATURE THYLAKOID1  
880 proteins modify thylakoid architecture by inducing membrane curvature. *Plant*  
881 *Cell* **25**, 2661-2678.
- 882 **Aryamanesh, N., Ruwe, H., Sanglard, L.V., Eshraghi, L., Bussell, J.D., Howell, K.A.,  
883 Small, I., and des Francs-Small, C.C.** (2017). The Pentatricopeptide Repeat  
884 Protein EMB2654 Is Essential for Trans-Splicing of a Chloroplast Small  
885 Ribosomal Subunit Transcript. *Plant Physiol.* **173**, 1164-1176.
- 886 **Axelsson, E., Lundqvist, J., Sawicki, A., Nilsson, S., Schroder, I., Al-Karadaghi, S.,  
887 Willows, R.D., and Hansson, M.** (2006). Recessiveness and dominance in  
888 barley mutants deficient in Mg-chelatase subunit D, an AAA protein involved in  
889 chlorophyll biosynthesis. *Plant Cell* **18**, 3606-3616.

- 890 **Bailey, T.L., Boden, M., Buske, F.A., Frith, M., Grant, C.E., Clementi, L., Ren, J., Li,**  
891 **W.W., and Noble, W.S. (2009).** MEME SUITE: tools for motif discovery and  
892 searching. *Nucleic Acids Res.* **37**, W202-208.
- 893 **Belgio, E., Ungerer, P., and Ruban, A.V. (2015).** Light-harvesting superstructures of  
894 green plant chloroplasts lacking photosystems. *Plant Cell Environ.* **38**, 2035-  
895 2047.
- 896 **Borner, T. (2017).** The discovery of plastid-to-nucleus retrograde signaling—a personal  
897 perspective. *Protoplasma* **254**, 1845-1855.
- 898 **Börner, T., Zhelyazkova, P., Legen, J., and Schmitz-Linneweber, C. (2014).**  
899 Chloroplast gene expression - RNA synthesis and processing. In *Plastid Biology*,  
900 S.M. Theg and F.A. Wollman, eds (Dordrecht, The Netherlands: Springer), pp. 3-  
901 47.
- 902 **Bradbeer, J.W., Atkinson, Y.E., Börner, T., and Hagemann, R. (1979).** Cytoplasmic  
903 synthesis of plastid polypeptides may be controlled by plastid-synthesised RNA.  
904 *Nature* **279**, 816-817.
- 905 **Budhagatapalli, N., Schedel, S., Gurushidze, M., Pencs, S., Hiekel, S., Rutten, T.,**  
906 **Kusch, S., Morbitzer, R., Lahaye, T., Panstruga, R., Kumlehn, J., and**  
907 **Hensel, G. (2016).** A simple test for the cleavage activity of customized  
908 endonucleases in plants. *Plant Methods* **12**, 18.
- 909 **Cockram, J., Thiel, T., Steuernagel, B., Stein, N., Taudien, S., Bailey, P.C., and**  
910 **O'Sullivan, D.M. (2012).** Genome dynamics explain the evolution of flowering  
911 time CCT domain gene families in the Poaceae. *PLoS One* **7**, e45307.
- 912 **Crooks, G.E., Hon, G., Chandonia, J.M., and Brenner, S.E. (2004).** WebLogo: a  
913 sequence logo generator. *Genome Res.* **14**, 1188-1190.
- 914 **Cwiek-Kupczynska, H., Altmann, T., Arend, D., Arnaud, E., Chen, D., Cornut, G.,**  
915 **Fiorani, F., Frohberg, W., Junker, A., Klukas, C., Lange, M., Mazurek, C.,**  
916 **Nafissi, A., Neveu, P., van Oeveren, J., Pommier, C., Poorter, H., Rocca-**  
917 **Serra, P., Sansone, S.A., Scholz, U., van Schriek, M., Seren, U., Usadel, B.,**  
918 **Weise, S., Kersey, P., and Krajewski, P. (2016).** Measures for interoperability  
919 of phenotypic data: minimum information requirements and formatting. *Plant*  
920 *Methods* **12**, 44.
- 921 **Daghma, D.S., Kumlehn, J., and Melzer, M. (2011).** The use of cyanobacteria as filler  
922 in nitrocellulose capillaries improves ultrastructural preservation of immature  
923 barley pollen upon high pressure freezing. *J. Microsc.* **244**, 79-84.
- 924 **De Bodt, S., Maere, S., and Van de Peer, Y. (2005).** Genome duplication and the  
925 origin of angiosperms. *Trends Ecol. Evol.* **20**, 591-597.
- 926 **de Souza, A., Wang, J.Z., and Dehesh, K. (2017).** Retrograde Signals: Integrators of  
927 Interorganellar Communication and Orchestrators of Plant Development. *Annu.*  
928 *Rev. Plant Biol.* **68**, 85-108.
- 929 **Dekker, J.P., and Boekema, E.J. (2005).** Supramolecular organization of thylakoid  
930 membrane proteins in green plants. *Biochim. Biophys. Acta* **1706**, 12-39.
- 931 **Delannoy, E., Le Ret, M., Faivre-Nitschke, E., Estavillo, G.M., Bergdoll, M., Taylor,**  
932 **N.L., Pogson, B.J., Small, I., Imbault, P., and Gualberto, J.M. (2009).**  
933 *Arabidopsis* tRNA adenosine deaminase arginine edits the wobble nucleotide of  
934 chloroplast tRNA<sup>Arg</sup>(ACG) and is essential for efficient chloroplast translation.  
935 *Plant Cell* **21**, 2058-2071.



- 936 **Drew, B.T., Ruhfel, B.R., Smith, S.A., Moore, M.J., Briggs, B.G., Gitzendanner,**  
937 **M.A., Soltis, P.S., and Soltis, D.E.** (2014). Another look at the root of the  
938 angiosperms reveals a familiar tale. *Syst. Biol.* **63**, 368-382.
- 939 **Emanuelsson, O., Nielsen, H., and von Heijne, G.** (1999). ChloroP, a neural network-  
940 based method for predicting chloroplast transit peptides and their cleavage sites.  
941 *Protein Sci.* **8**, 978-984.
- 942 **Force, A., Lynch, M., Pickett, F.B., Amores, A., Yan, Y.L., and Postlethwait, J.**  
943 (1999). Preservation of duplicate genes by complementary, degenerative  
944 mutations. *Genetics* **151**, 1531-1545.
- 945 **Fristedt, R., Willig, A., Granath, P., Crevecoeur, M., Rochaix, J.D., and Vener, A.V.**  
946 (2009). Phosphorylation of photosystem II controls functional macroscopic folding  
947 of photosynthetic membranes in *Arabidopsis*. *Plant Cell* **21**, 3950-3964.
- 948 **Goodstein, D.M., Shu, S., Howson, R., Neupane, R., Hayes, R.D., Fazo, J., Mitros,**  
949 **T., Dirks, W., Hellsten, U., Putnam, N., and Rokhsar, D.S.** (2012). Phytozome:  
950 a comparative platform for green plant genomics. *Nucleic Acids Res.* **40**, D1178-  
951 1186.
- 952 **Gottwald, S., Bauer, P., Komatsuda, T., Lundqvist, U., and Stein, N.** (2009).  
953 TILLING in the two-rowed barley cultivar 'Barke' reveals preferred sites of  
954 functional diversity in the gene *HvHox1*. *BMC Res. Notes* **2**, 258.
- 955 **Gould, S.B., Waller, R.F., and McFadden, G.I.** (2008). Plastid evolution. *Annu. Rev.*  
956 *Plant Biol.* **59**, 491-517.
- 957 **Hagemann, R., and Scholz, F.** (1962). A case of gene induced mutations of the  
958 plasmotype in barley. *Theor Appl Genet* **32**, 50-59.
- 959 **Hall, B.G.** (2013). Building phylogenetic trees from molecular data with MEGA. *Mol.*  
960 *Biol. Evol.* **30**, 1229-1235.
- 961 **Hausler, R.E., Geimer, S., Kunz, H.H., Schmitz, J., Dormann, P., Bell, K., Hetfeld,**  
962 **S., Guballa, A., and Flugge, U.I.** (2009). Chlororespiration and grana  
963 hyperstacking: how an *Arabidopsis* double mutant can survive despite defects in  
964 starch biosynthesis and daily carbon export from chloroplasts. *Plant Physiol.* **149**,  
965 515-533.
- 966 **Henningsen, K.W., Boynton, J.E., and Wettstein, D.V.** (1993). Mutants at xantha and  
967 albina loci in relation to chloroplast biogenesis in barley (*Hordeum vulgare* L.).  
968 (Copenhagen K, Denmark: Munksgaard Export and Subscription Service).
- 969 **Hensel, G., Kastner, C., Oleszczuk, S., Riechen, J., and Kumlehn, J.** (2009).  
970 *Agrobacterium*-mediated gene transfer to cereal crop plants: current protocols for  
971 barley, wheat, triticale, and maize. *Int J Plant Genomics* **2009**, 835608.
- 972 **Hernandez-Verdeja, T., and Strand, A.** (2018). Retrograde Signals Navigate the Path  
973 to Chloroplast Development. *Plant Physiol.* **176**, 967-976.
- 974 **Hess, W.R., Prombona, A., Fieder, B., Subramanian, A.R., and Börner, T.** (1993).  
975 Chloroplast *rps15* and the *rpoB/C1/C2* gene cluster are strongly transcribed in  
976 ribosome-deficient plastids: evidence for a functioning non-chloroplast-encoded  
977 RNA polymerase. *EMBO J.* **12**, 563-571.
- 978 **J. Simpson, D., Vallon, O., and Vonwettstein, D.** (1989). Freeze-fracture studies on  
979 barley plastid membranes VIII. In *viridis-115*, a mutant completely lacking  
980 Photosystem II, oxygen evolution enhancer 1 (OEE1) and the  $\alpha$ -subunit of  
981 cytochrome b-559 accumulate in appressed thylakoids.

- 982 **J.W.A Porra, R., Thompson, W.A., and Kriedemann, P.E.** (1989). Determination of  
983 Accurate Extinction Coefficients and Simultaneous Equations for Assaying  
984 Chlorophyll a and b Extracted with Four Different Solvents: Verification of the  
985 Concentration of Chlorophyll Standards by Atomic Absorption Spectroscopy.
- 986 **Jang, S., Marchal, V., Panigrahi, K.C., Wenkel, S., Soppe, W., Deng, X.W.,**  
987 **Valverde, F., and Coupland, G.** (2008). Arabidopsis COP1 shapes the temporal  
988 pattern of CO accumulation conferring a photoperiodic flowering response.  
989 *EMBO J.* **27**, 1277-1288.
- 990 **Jia, H., Liggins, J.R., and Chow, W.S.** (2012). Acclimation of leaves to low light  
991 produces large grana: the origin of the predominant attractive force at work.  
992 *Philos. Trans. R. Soc. Lond. B Biol. Sci.* **367**, 3494-3502.
- 993 **Junker, A., Muraya, M.M., Weigelt-Fischer, K., Arana-Ceballos, F., Klukas, C.,**  
994 **Melchinger, A.E., Meyer, R.C., Riewe, D., and Altmann, T.** (2014). Optimizing  
995 experimental procedures for quantitative evaluation of crop plant performance in  
996 high throughput phenotyping systems. *Front Plant Sci* **5**, 770.
- 997 **Kleine, T., and Leister, D.** (2016). Retrograde signaling: Organelles go networking.  
998 *Biochim. Biophys. Acta* **1857**, 1313-1325.
- 999 **Klukas, C., Chen, D., and Pape, J.M.** (2014). Integrated Analysis Platform: An Open-  
1000 Source Information System for High-Throughput Plant Phenotyping. *Plant*  
1001 *Physiol.* **165**, 506-518.
- 1002 **Kohler, D., Helm, S., Agne, B., and Baginsky, S.** (2016). Importance of Translocon  
1003 Subunit Tic56 for rRNA Processing and Chloroplast Ribosome Assembly. *Plant*  
1004 *Physiol.* **172**, 2429-2444.
- 1005 **Lafon-Placette, C., Vallejo-Marin, M., Parisod, C., Abbott, R.J., and Kohler, C.**  
1006 (2016). Current plant speciation research: unravelling the processes and  
1007 mechanisms behind the evolution of reproductive isolation barriers. *New Phytol*  
1008 **209**, 29-33.
- 1009 **Lai, J., Ma, J., Swigonova, Z., Ramakrishna, W., Linton, E., Llaca, V., Tanyolac, B.,**  
1010 **Park, Y.J., Jeong, O.Y., Bennetzen, J.L., and Messing, J.** (2004). Gene loss  
1011 and movement in the maize genome. *Genome Res.* **14**, 1924-1931.
- 1012 **Lee, D.W., and Hwang, I.** (2018). Evolution and Design Principles of the Diverse  
1013 Chloroplast Transit Peptides. *Mol. Cells* **41**, 161-167.
- 1014 **Leister, D.** (2003). Chloroplast research in the genomic age. *Trends Genet.* **19**, 47-56.
- 1015 **Letunic, I., and Bork, P.** (2016). Interactive tree of life (iTOL) v3: an online tool for the  
1016 display and annotation of phylogenetic and other trees. *Nucleic Acids Res.* **44**,  
1017 W242-245.
- 1018 **Li, M., Hensel, G., Mascher, M., Melzer, M., Budhagatapalli, N., Rutten, T.,**  
1019 **Himmelbach, A., Beier, S., Korzun, V., Kumlehn, J., Borner, T., and Stein, N.**  
1020 (2019). Leaf Variegation and Impaired Chloroplast Development Caused by a  
1021 Truncated CCT Domain Gene in albobriars Barley. *Plant Cell* **31**, 1430-1445.
- 1022 **Liu, J., Zhou, W., Liu, G., Yang, C., Sun, Y., Wu, W., Cao, S., Wang, C., Hai, G.,**  
1023 **Wang, Z., Bock, R., Huang, J., and Cheng, Y.** (2015). The conserved  
1024 endoribonuclease YbeY is required for chloroplast ribosomal RNA processing in  
1025 Arabidopsis. *Plant Physiol.* **168**, 205-221.
- 1026 **Lynch, M., and Conery, J.S.** (2000). The evolutionary fate and consequences of  
1027 duplicate genes. *Science* **290**, 1151-1155.

- 1028 **Marchler-Bauer, A., Bo, Y., Han, L., He, J., Lanczycki, C.J., Lu, S., Chitsaz, F.,**  
1029 **Derbyshire, M.K., Geer, R.C., Gonzales, N.R., Gwadz, M., Hurwitz, D.I., Lu,**  
1030 **F., Marchler, G.H., Song, J.S., Thanki, N., Wang, Z., Yamashita, R.A., Zhang,**  
1031 **D., Zheng, C., Geer, L.Y., and Bryant, S.H. (2017). CDD/SPARCLE: functional**  
1032 **classification of proteins via subfamily domain architectures. Nucleic Acids Res.**  
1033 **45, D200-D203.**
- 1034 **Mascher, M., Gundlach, H., Himmelbach, A., Beier, S., Twardziok, S.O., Wicker, T.,**  
1035 **Radchuk, V., Dockter, C., Hedley, P.E., Russell, J., Bayer, M., Ramsay, L.,**  
1036 **Liu, H., Haberer, G., Zhang, X.Q., Zhang, Q., Barrero, R.A., Li, L., Taudien,**  
1037 **S., Groth, M., Felder, M., Hastie, A., Simkova, H., Stankova, H., Vrana, J.,**  
1038 **Chan, S., Munoz-Amatriain, M., Ounit, R., Wanamaker, S., Bolser, D.,**  
1039 **Colmsee, C., Schmutzer, T., Aliyeva-Schnorr, L., Grasso, S., Tanskanen, J.,**  
1040 **Chailyan, A., Sampath, D., Heavens, D., Clissold, L., Cao, S., Chapman, B.,**  
1041 **Dai, F., Han, Y., Li, H., Li, X., Lin, C., McCooke, J.K., Tan, C., Wang, P.,**  
1042 **Wang, S., Yin, S., Zhou, G., Poland, J.A., Bellgard, M.I., Borisjuk, L.,**  
1043 **Houben, A., Dolezel, J., Ayling, S., Lonardi, S., Kersey, P., Langridge, P.,**  
1044 **Muehlbauer, G.J., Clark, M.D., Caccamo, M., Schulman, A.H., Mayer, K.F.X.,**  
1045 **Platzer, M., Close, T.J., Scholz, U., Hansson, M., Zhang, G., Braumann, I.,**  
1046 **Spannagl, M., Li, C., Waugh, R., and Stein, N. (2017). A chromosome**  
1047 **conformation capture ordered sequence of the barley genome. Nature** **544**, 427-  
1048 433.
- 1049 **Meier, D., and K. Lichtenthaler, H. (1981). Ultrastructural development of chloroplasts**  
1050 **in radish seedlings grown at high- and low-light conditions and in the presence of**  
1051 **the herbicide bentazon.**
- 1052 **Mostowska, A. (1986). Thylakoid and grana formation during the development of pea**  
1053 **chloroplasts, illuminated by white, red, and blue low intensity light. Protoplasma**  
1054 **134**, 88-94.
- 1055 **Muhlhausen, S., and Kollmar, M. (2013). Whole genome duplication events in plant**  
1056 **evolution reconstructed and predicted using myosin motor proteins. BMC Evol.**  
1057 **Biol.** **13**, 202.
- 1058 **Olsson, U., Sirijovski, N., and Hansson, M. (2004). Characterization of eight barley**  
1059 **xantha-f mutants deficient in magnesium chelatase. Plant Physiol. Biochem.** **42**,  
1060 557-564.
- 1061 **Paterson, A.H., Bowers, J.E., and Chapman, B.A. (2004). Ancient polyploidization**  
1062 **predating divergence of the cereals, and its consequences for comparative**  
1063 **genomics. Proc. Natl. Acad. Sci. U. S. A.** **101**, 9903-9908.
- 1064 **Petsalaki, E.I., Bagos, P.G., Litou, Z.I., and Hamodrakas, S.J. (2006). PredSL: a tool**  
1065 **for the N-terminal sequence-based prediction of protein subcellular localization.**  
1066 **Genomics Proteomics Bioinformatics** **4**, 48-55.
- 1067 **Pietrzykowska, M., Suorsa, M., Semchonok, D.A., Tikkanen, M., Boekema, E.J.,**  
1068 **Aro, E.M., and Jansson, S. (2014). The light-harvesting chlorophyll a/b binding**  
1069 **proteins Lhcb1 and Lhcb2 play complementary roles during state transitions in**  
1070 **Arabidopsis. Plant Cell** **26**, 3646-3660.
- 1071 **Pogson, B.J., and Albrecht, V. (2011). Genetic dissection of chloroplast biogenesis**  
1072 **and development: an overview. Plant Physiol.** **155**, 1545-1551.

- 1073 **Pogson, B.J., Ganguly, D., and Albrecht-Borth, V.** (2015). Insights into chloroplast  
1074 biogenesis and development. *Biochim. Biophys. Acta* **1847**, 1017-1024.
- 1075 **Pribil, M., Pesaresi, P., Hertle, A., Barbato, R., and Leister, D.** (2010). Role of plastid  
1076 protein phosphatase TAP38 in LHCII dephosphorylation and thylakoid electron  
1077 flow. *PLoS Biol.* **8**, e1000288.
- 1078 **Puthiyaveetil, S., van Oort, B., and Kirchhoff, H.** (2017). Surface charge dynamics in  
1079 photosynthetic membranes and the structural consequences. *Nat Plants* **3**,  
1080 17020.
- 1081 **Rocca-Serra, P., Brandizi, M., Maguire, E., Sklyar, N., Taylor, C., Begley, K., Field,  
1082 D., Harris, S., Hide, W., Hofmann, O., Neumann, S., Sterk, P., Tong, W., and  
1083 Sansone, S.A.** (2010). ISA software suite: supporting standards-compliant  
1084 experimental annotation and enabling curation at the community level.  
1085 *Bioinformatics* **26**, 2354-2356.
- 1086 **Rogalski, M., Schottler, M.A., Thiele, W., Schulze, W.X., and Bock, R.** (2008). Rpl33,  
1087 a nonessential plastid-encoded ribosomal protein in tobacco, is required under  
1088 cold stress conditions. *Plant Cell* **20**, 2221-2237.
- 1089 **Samol, I., Shapiguzov, A., Ingelsson, B., Fucile, G., Crevecoeur, M., Vener, A.V.,  
1090 Rochaix, J.D., and Goldschmidt-Clermont, M.** (2012). Identification of a  
1091 photosystem II phosphatase involved in light acclimation in *Arabidopsis*. *Plant*  
1092 *Cell* **24**, 2596-2609.
- 1093 **Soltis, D.E., Albert, V.A., Leebens-Mack, J., Bell, C.D., Paterson, A.H., Zheng, C.,  
1094 Sankoff, D., Depamphilis, C.W., Wall, P.K., and Soltis, P.S.** (2009). Polyploidy  
1095 and angiosperm diversification. *Am. J. Bot.* **96**, 336-348.
- 1096 **Sun, C.W., Huang, Y.C., and Chang, H.Y.** (2009). CIA2 coordinately up-regulates  
1097 protein import and synthesis in leaf chloroplasts. *Plant Physiol.* **150**, 879-888.
- 1098 **Sun, C.W., Chen, L.J., Lin, L.C., and Li, H.M.** (2001). Leaf-specific upregulation of  
1099 chloroplast translocon genes by a CCT motif-containing protein, CIA2. *Plant Cell*  
1100 **13**, 2053-2061.
- 1101 **Takahashi, S., and Badger, M.R.** (2011). Photoprotection in plants: a new light on  
1102 photosystem II damage. *Trends Plant Sci* **16**, 53-60.
- 1103 **Tamura, K., Stecher, G., Peterson, D., Filipski, A., and Kumar, S.** (2013). MEGA6:  
1104 Molecular Evolutionary Genetics Analysis version 6.0. *Mol. Biol. Evol.* **30**, 2725-  
1105 2729.
- 1106 **Thiel, T., Kota, R., Grosse, I., Stein, N., and Graner, A.** (2004). SNP2CAPS: a SNP  
1107 and INDEL analysis tool for CAPS marker development. *Nucleic Acids Res.* **32**,  
1108 e5.
- 1109 **Thiel, T., Graner, A., Waugh, R., Grosse, I., Close, T.J., and Stein, N.** (2009).  
1110 Evidence and evolutionary analysis of ancient whole-genome duplication in  
1111 barley predating the divergence from rice. *BMC Evol. Biol.* **9**, 209.
- 1112 **Tiller, N., and Bock, R.** (2014). The translational apparatus of plastids and its role in  
1113 plant development. *Mol Plant* **7**, 1105-1120.
- 1114 **Tschiersch, H., Junker, A., Meyer, R.C., and Altmann, T.** (2017). Establishment of  
1115 integrated protocols for automated high throughput kinetic chlorophyll  
1116 fluorescence analyses. *Plant Methods* **13**, 54.

- 1117 **Vamosi, J.C., Magallon, S., Mayrose, I., Otto, S.P., and Sauquet, H.** (2018).  
1118 Macroevolutionary Patterns of Flowering Plant Speciation and Extinction. *Annu.*  
1119 *Rev. Plant Biol.* **69**, 685-706.
- 1120 **Van de Peer, Y., Mizrachi, E., and Marchal, K.** (2017). The evolutionary significance of  
1121 polyploidy. *Nat Rev Genet* **18**, 411-424.
- 1122 **Walter, M., Piepenburg, K., Schottler, M.A., Petersen, K., Kahlau, S., Tiller, N.,**  
1123 **Drechsel, O., Weingartner, M., Kudla, J., and Bock, R.** (2010). Knockout of the  
1124 plastid RNase E leads to defective RNA processing and chloroplast ribosome  
1125 deficiency. *Plant J.* **64**, 851-863.
- 1126 **Wenkel, S., Turck, F., Singer, K., Gissot, L., Le Gourrierec, J., Samach, A., and**  
1127 **Coupland, G.** (2006). CONSTANS and the CCAAT box binding complex share a  
1128 functionally important domain and interact to regulate flowering of Arabidopsis.  
1129 *Plant Cell* **18**, 2971-2984.
- 1130 **Willi, J., Kupfer, P., Evequoz, D., Fernandez, G., Katz, A., Leumann, C., and**  
1131 **Polacek, N.** (2018). Oxidative stress damages rRNA inside the ribosome and  
1132 differentially affects the catalytic center. *Nucleic Acids Res.* **46**, 1945-1957.
- 1133 **Wood, W.H., Barnett, S.F.H., Flannery, S., Hunter, C.N., and Johnson, M.P.** (2019).  
1134 Dynamic thylakoid stacking is regulated by LHClI phosphorylation but not its  
1135 interaction with photosystem I. *Plant Physiol.*
- 1136 **Wood, W.H.J., MacGregor-Chatwin, C., Barnett, S.F.H., Mayneord, G.E., Huang, X.,**  
1137 **Hobbs, J.K., Hunter, C.N., and Johnson, M.P.** (2018). Dynamic thylakoid  
1138 stacking regulates the balance between linear and cyclic photosynthetic electron  
1139 transfer. *Nat Plants* **4**, 116-127.
- 1140 **Zhang, Y.Y., Hao, Y.Y., Wang, Y.H., Wang, C.M., Wang, Y.L., Long, W.H., Wang, D.,**  
1141 **Liu, X., Jiang, L., and Wan, J.M.** (2017). Lethal albinic seedling, encoding a  
1142 threonyl-tRNA synthetase, is involved in development of plastid protein synthesis  
1143 system in rice. *Plant Cell Rep* **36**, 1053-1064.
- 1144 **Zhelyazkova, P., Sharma, C.M., Forstner, K.U., Liere, K., Vogel, J., and Borner, T.**  
1145 (2012). The Primary Transcriptome of Barley Chloroplasts: Numerous Noncoding  
1146 RNAs and the Dominating Role of the Plastid-Encoded RNA Polymerase. *Plant*  
1147 *Cell* **24**, 123-136.

1148

## 1149 **FIGURE LEGENDS**

### 1150 **Figure 1. Phylogenetic analysis of *HvASL* and *HvAST* homologous genes.**

1151 The phylogenetic tree shows *Amborella trichopoda* as a sister group to all other  
1152 angiosperm species. The two main branches separate the monocots and dicots,  
1153 indicated by green and blue colour, respectively. Evolutionary analysis reveals a single  
1154 pair of paralogs in diploids, and two pairs of paralogs in tetraploids. The paralogs of  
1155 each species divide into two branches; each branch contains the corresponding  
1156 orthologs for species in families *Poaceae*, *Salicaceae*, *Fabaceae*, *Crassulaceae* and

1157 *Brassicaceae*. Maintenance of these paralog pairs indicates that *HvASL* probably  
1158 retained an important function in barley. The numbers above/below the branches  
1159 represent bootstrap values which indicate reliability of the cluster descending from that  
1160 node. The red colour node indicates where splitting of the orthologous groups occurred.  
1161 Positions of *HvASL*, *HvAST*, *AtCIL* and *AtCIA2* are highlighted in bold. Family  
1162 information is indicated outside the coloured stripes.

## 1163 **Figure 2. Functional validation of *HvCMF3* by TILLING and allelism test.**

1164 (A) TILLING screening strategy. Screening of coding regions of *HvCMF3* by three  
1165 primer pairs. Red arrows indicate the relative position of the stop codons of TILLING  
1166 families 4383-1 and 13082-1.

1167 (B) Summary of the identified mutations. TILLING screening revealed a total of 54  $M_3$   
1168 mutant families with lesions in the *HvCMF3* gene, including 28 non-synonymous, 24  
1169 synonymous, and 2 pre-stop mutations. Transition mutation (G to A) at position 861  
1170 results in an immature stop codon in family 4383-1. Pre-stop family 13082-1 carries a  
1171 transversion mutation (A to T) at position 1135. The adenine of the *HvCMF3* start codon  
1172 refers as position 1.

1173 (C) Phenotype of *Hvcmf3* mutants compared with wild type cv. 'Barke' at developmental  
1174 stage 3 days after germination. Leaves of *Hvcmf3-1* mutant exhibit a *xantha* phenotype.  
1175 Compared to *Hvcmf3-1*, the chlorophyll-deficient phenotype of *Hvcmf3-2* mutant is less  
1176 severe. The  $F_1$  hybrid, *Hvcmf3-1/Hvcmf3-2* derived from crossing 4383-1 x 13082-1,  
1177 exhibits a pale green phenotype.

## 1178 **Figure 3. Site-directed mutagenesis of *HvCMF3* gene by RNA-guided Cas9** 1179 **endonuclease**

1180 (A) Selection of Cas9/gRNA target sites. The two target motifs (Target Motif 1 and 2) in  
1181 the anti-sense strand are underlined; the respective protospacer adjacent motif is  
1182 highlighted in blue. The nucleotide in green colour indicates the position of the pre-stop  
1183 mutation in the *Hvcmf3-1* mutant.

1184 (B) Alignment of *HvCMF3* sequences of wild-type and  $T_0$  plantlets carrying mutations at  
1185 target motif 1.

1186 (C) Alignment of *HvCMF3* sequences of wild-type and T<sub>0</sub> plantlets carrying mutations at  
1187 target motif 2. The chimeric and/or heterozygous T<sub>0</sub> regenerant BG677E5A carries  
1188 multiple mutations with each mutation shown in one single row.

1189 (D) Alignment of *HvCMF3* sequences of wild-type and T<sub>1</sub> homozygous mutant plants.  
1190 Across panels, deletions are represented by red hyphens and insertions by red letters.  
1191 The specific mutation of each plant is shown on the right of each sequence;  
1192 presence/absence of wild-type allele is indicated by symbols +/-, respectively.

1193 (E) Phenotype of Cas9-induced homozygous *Hvcmf3* mutants at developmental stages  
1194 3 and 10 days after germination.

#### 1195 **Figure 4. Novel conserved functional region of HvCMF3.**

1196 (A) Alignment of 131 *HvCMF3* homologous protein sequences from 66 species revealed  
1197 five conserved regions which include the N-terminal chloroplast transit peptides domain,  
1198 the C-terminal CCT domain and three novel conserved regions. In addition, the  
1199 homologous genes contain multiple conserved peptides indicated by red dots below the  
1200 position IDs. The conserved regions are marked with underline and highlighted with  
1201 coloured circles. The region given in parentheses indicates the corresponding position  
1202 of the conserved region in reference to *HvCMF3*. Alignment was manually edited by  
1203 removing wrongly predicted sequence regions and by filling gaps. There were a total of  
1204 675 positions left. The online tool Weblogo was adopted for graphic generation.

1205 (B) Conservation analysis of the functional region of *HvCMF3* identified in this study..  
1206 For each position, the overall height of the stack indicates the sequence conservation at  
1207 that position, while the height of symbols within the stack indicates the relative  
1208 frequency of each amino acid at that position.

#### 1209 **Figure 5. rRNA analysis and chlorophyll content measurement**

1210 (A) Separation of cytosolic and plastid rRNAs using the Agilent high sensitivity RNA  
1211 ScreenTape assay.

1212 (B) Analysis of rRNA from wild type, *Hvcmf3* mutants and *xantha* mutants using an  
1213 Agilent TapeStation 4200.

1214 (C) - (D) Determination of plastid-to-cytosolic rRNA ratios. (C) 23S/25S; (D) 16S/25S.

1215 (E) Ratio of the plastid 23S rRNA to the plastid 16S rRNA.  
1216 (F) – (H) Analysis of chlorophyll contents and ratio between chlorophyll *a* and  
1217 chlorophyll *b*. Results are presented as means  $\pm$  SE. *t*-test significant level: \*  $p < 0.05$ ,  
1218 \*\*  $p < 0.01$ , \*\*\*  $p < 0.001$ , n.s: not significant. Three plants per genotype were analyzed.

1219 **Figure 6. Determination of photosynthetic parameters and growth dynamics of**  
1220 ***Hvcmf3* mutant and wild-type control plants.**

1221 (A) to (E) Measurement of photosynthetic parameters during early developmental  
1222 stages. Results are presented as means  $\pm$  SE. *Student's t*-test significant levels, \*  $p$   
1223  $< 0.05$ , \*\*  $p < 0.01$ . ETR, electron transport rate;  $\Phi_{\text{PSII}}$ , photosystem II operating efficiency;  
1224  $qP$ , fraction of PSII centers that are 'open' based on the puddle model;  $F_v/F_m$ , maximum  
1225 quantum yield of PSII photochemistry measured in the dark-adapted state; NPQ, non-  
1226 photochemical quenching.  
1227 (F) Plant growth dynamics. Left panel is yellow/green pixel ratio, and right panel is  
1228 projected leaf area.

1229 **Figure 7. Quantification of chloroplast architecture components.**

1230 (A) Diagram for demonstrating the chloroplast length, width, and surface area.  
1231 (B) Illustration demonstrating the counting of thylakoid.  
1232 (C) to (H) Comparison of chloroplast morphology and grana architecture between wild  
1233 type and *Hvcmf3* mutants at developmental stages 3 days after germination.  
1234 Chloroplast length (C), chloroplast width (D), chloroplast surface area (E), grana  
1235 number (F), grana height (G), and thylakoid distance (H). Results are presented as  
1236 means  $\pm$  SE. *t*-test significant level: \*  $p < 0.05$ , \*\*  $p < 0.01$ , \*\*\*  $p < 0.001$ , n.s: not  
1237 significant. Number of chloroplast analyzed  $n \geq 24$ .

1238 **Figure 8. Subcellular localization of HvCMF3.**

1239 (A) Schematic diagram of the constructs prepared for transient expression. *pZmUbi*,  
1240 maize *UBIQUITIN1* promoter. *pCaMVd35S*, Cauliflower Mosaic Virus doubled-  
1241 enhanced 35S promoter. GFP, green fluorescent protein. mCherry, mCherry fluorescent  
1242 protein; PLS, plastid localization signal, i.e. the chloroplast transit peptide (N-terminal 79



1243 amino acids) of the small subunit of tobacco RUBISCO. HvCMF3, coding sequence of  
1244 wild-type *HvCMF3* gene. cTP\_95AA\_HvCMF3, N-terminal chloroplast transit peptide of  
1245 HvCMF3 with a length of 95 amino acids as predicted by online tool PredSL. tNOS,  
1246 *Agrobacterium nopaline synthase* terminator. The schematic drawing is not in proportion  
1247 with gene length.

1248 (B) Localization of GFP control with *GFP* being driven by the maize *UBIQUITIN1*  
1249 promoter.

1250 (C) Localization of the plastid marker.

1251 (D) Localization of HvCMF3:GFP. The GFP fluorescence signal is targeted both to  
1252 plastid and nucleus compartments.

1253 (E) Localization of cTP\_95AA\_HvCMF3:GFP. The yellow arrows in the merged panels  
1254 indicate the nucleus. The first leaf of 10-day-old barley seedlings was used for particle  
1255 bombardment. The fluorescence was checked 24 hours after bombardment. Scale bar  
1256 for all images is 20  $\mu\text{m}$ .

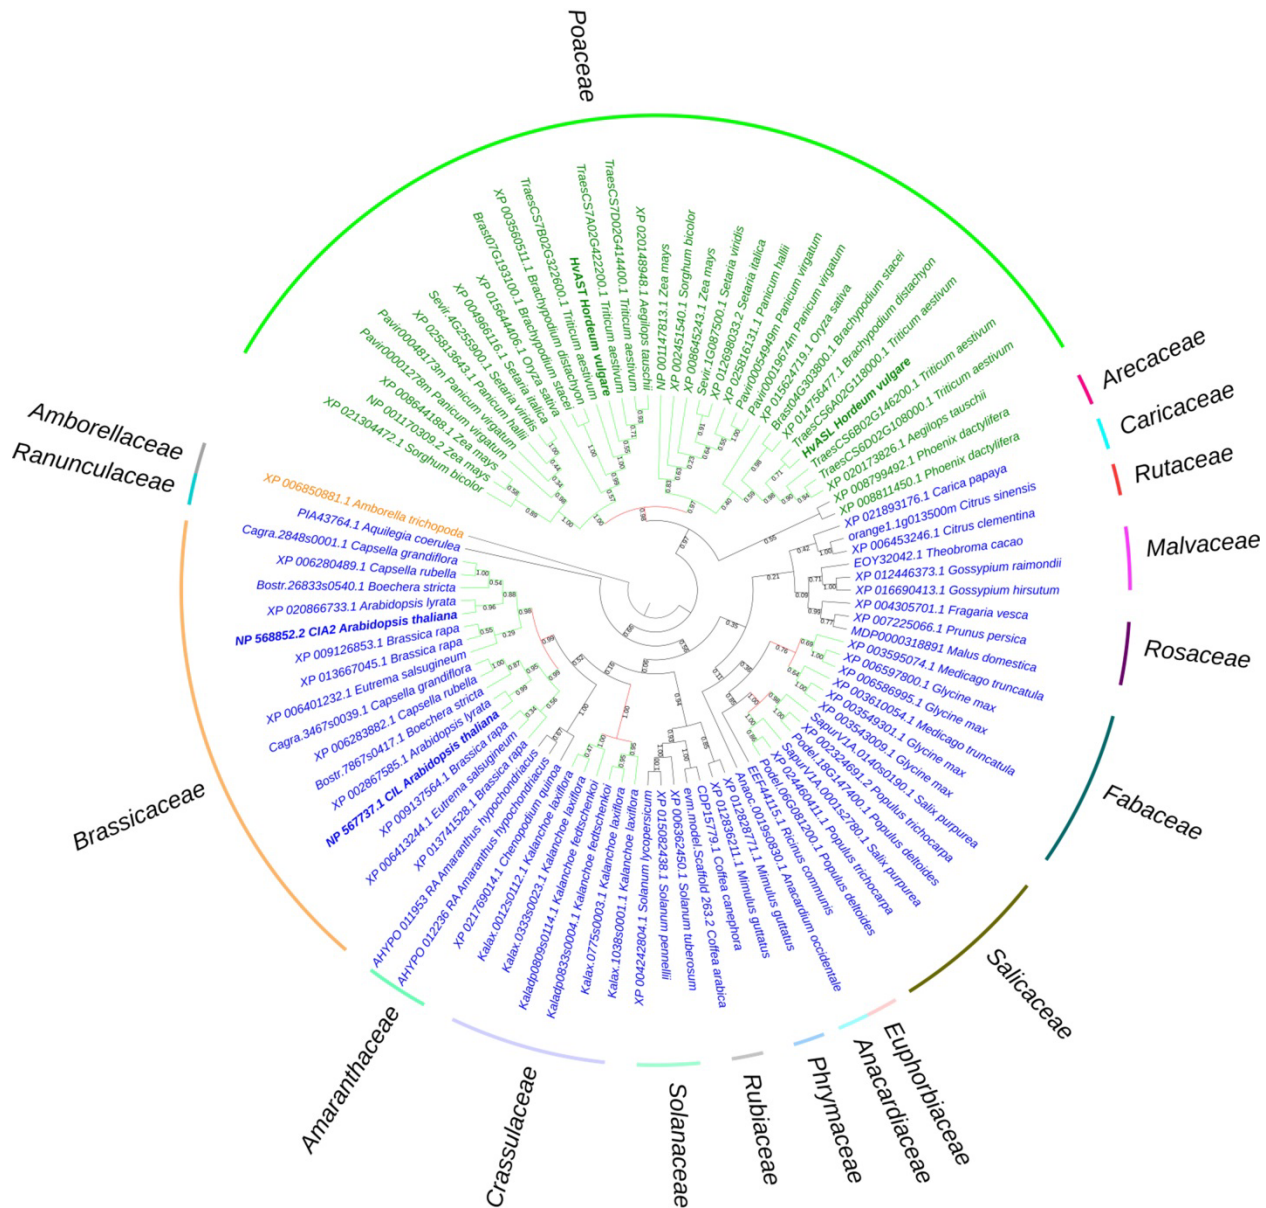

1257

1258 **Figure 1. Phylogenetic analysis of *HvASL* and *HvAST* homologous genes.**

1259 The phylogenetic tree shows *Amborella trichopoda* as a sister group to all other angiosperm species. The  
 1260 two main branches separate the monocots and dicots, indicated by green and blue colour, respectively.  
 1261 Evolutionary analysis reveals a single pair of paralogs in diploids, and two pairs of paralogs in tetraploids.  
 1262 The paralogs of each species divide into two branches; each branch contains the corresponding  
 1263 orthologs for species in families *Poaceae*, *Salicaceae*, *Fabaceae*, *Crassulaceae* and *Brassicaceae*.  
 1264 Maintenance of these paralog pairs indicates that *HvASL* probably retained an important function in  
 1265 barley. The numbers above/below the branches represent bootstrap values which indicate reliability of the  
 1266 cluster descending from that node. The red colour node indicates where splitting of the orthologous  
 1267 groups occurred. Positions of *HvASL*, *HvAST*, *AtCIL* and *AtCIA2* are highlighted in bold. Family  
 1268 information is indicated outside the coloured stripes.

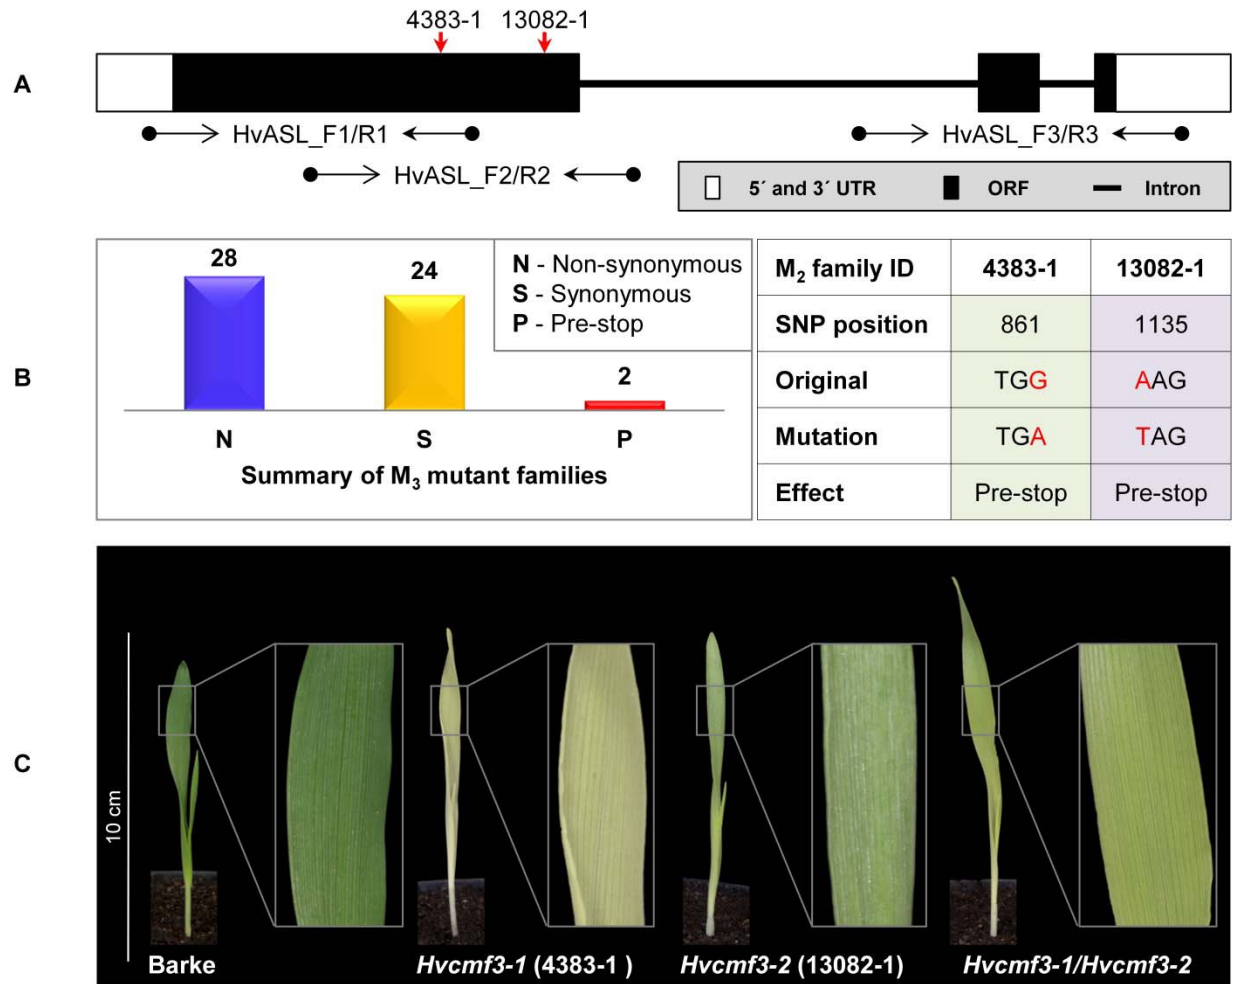

1269

1270 **Figure 2. Functional validation of *HvCMF3* by TILLING and allelism test.**

1271 (A) TILLING screening strategy. Screening of coding regions of *HvCMF3* by three primer pairs. Red  
 1272 arrows indicate the relative position of the stop codons of TILLING families 4383-1 and 13082-1.  
 1273 (B) Summary of the identified mutations. TILLING screening revealed a total of 54 M<sub>3</sub> mutant families with  
 1274 lesions in the *HvCMF3* gene, including 28 non-synonymous, 24 synonymous, and 2 pre-stop mutations.  
 1275 Transition mutation (G to A) at position 861 results in an immature stop codon in family 4383-1. Pre-stop  
 1276 family 13082-1 carries a transversion mutation (A to T) at position 1135. The adenine of the *HvCMF3* start  
 1277 codon refers as position 1.  
 1278 (C) Phenotype of *Hvcmf3* mutants compared with wild type cv. 'Barke' at developmental stage 3 days  
 1279 after germination. Leaves of *Hvcmf3-1* mutant exhibit a *xantha* phenotype. Compared to *Hvcmf3-1*, the  
 1280 chlorophyll-deficient phenotype of *Hvcmf3-2* mutant is less severe. The F<sub>1</sub> hybrid, *Hvcmf3-1/Hvcmf3-2*  
 1281 derived from crossing 4383-1 x 13082-1, exhibits a pale green phenotype.

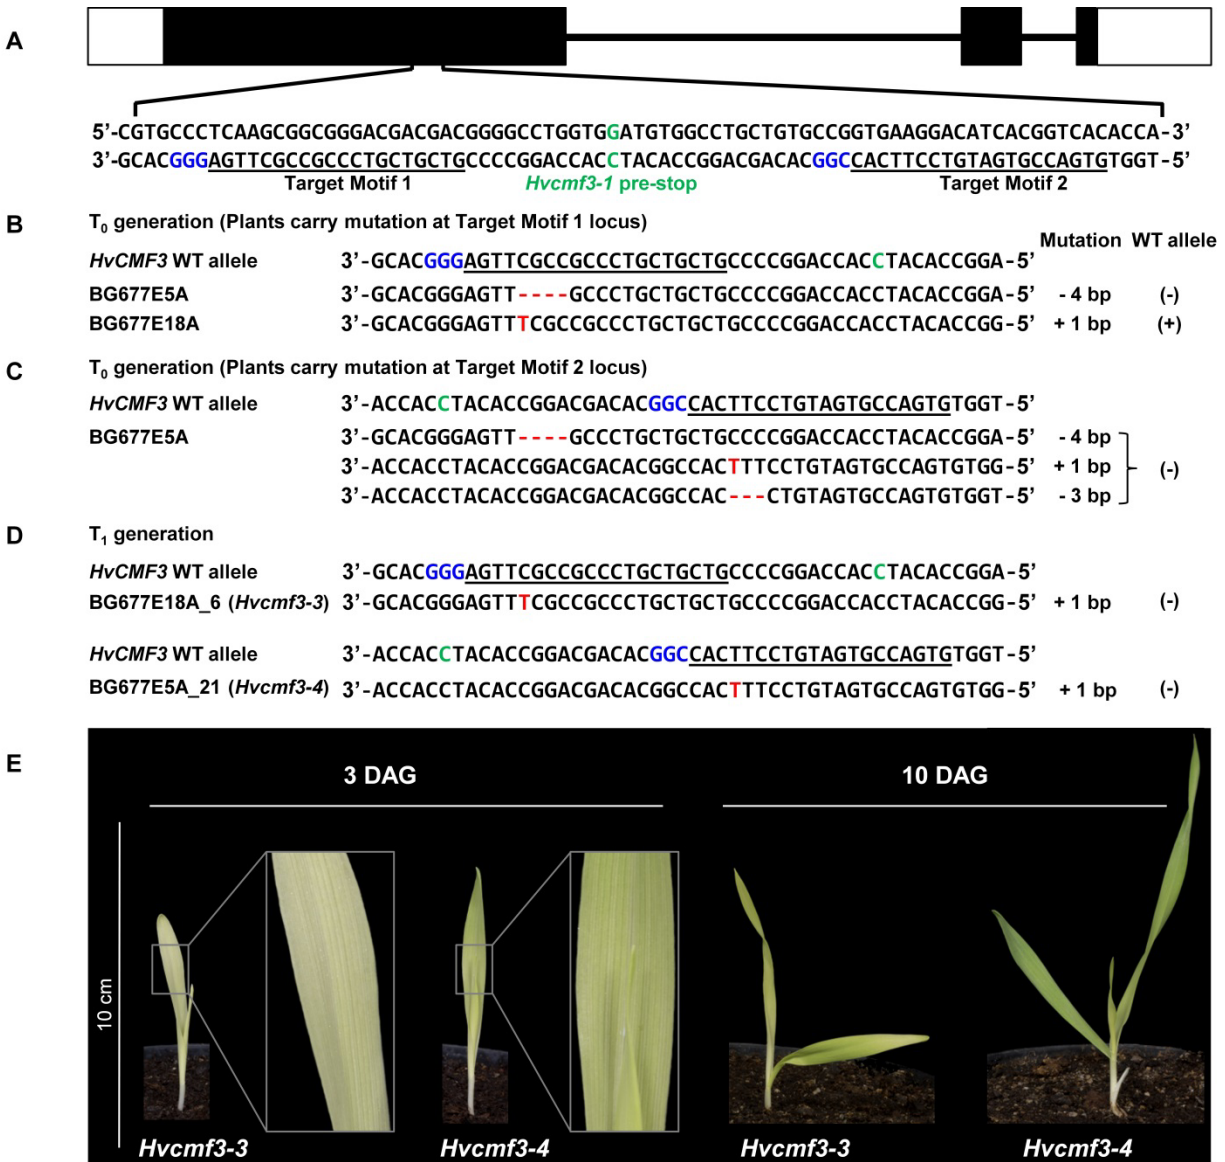

1282

1283 **Figure 3. Site-directed mutagenesis of *HvCMF3* gene by RNA-guided Cas9 endonuclease**

1284 (A) Selection of Cas9/gRNA target sites. The two target motifs (Target Motif 1 and 2) in the anti-sense  
 1285 strand are underlined; the respective protospacer adjacent motif is highlighted in blue. The nucleotide in  
 1286 green colour indicates the position of the pre-stop mutation in the *Hvcmf3-1* mutant.

1287 (B) Alignment of *HvCMF3* sequences of wild-type and T<sub>0</sub> plantlets carrying mutations at target motif 1.

1288 (C) Alignment of *HvCMF3* sequences of wild-type and T<sub>0</sub> plantlets carrying mutations at target motif 2.  
 1289 The chimeric and/or heterozygous T<sub>0</sub> regenerant BG677E5A carries multiple mutations with each  
 1290 mutation shown in one single row.

1291 (D) Alignment of *HvCMF3* sequences of wild-type and T<sub>1</sub> homozygous mutant plants. Across panels,  
 1292 deletions are represented by red hyphens and insertions by red letters. The specific mutation of each  
 1293 plant is shown on the right of each sequence; presence/absence of wild-type allele is indicated by  
 1294 symbols +/-, respectively.

1295 (E) Phenotype of Cas9-induced homozygous *Hvcmf3* mutants at developmental stages 3 and 10 days  
 1296 after germination.

1297

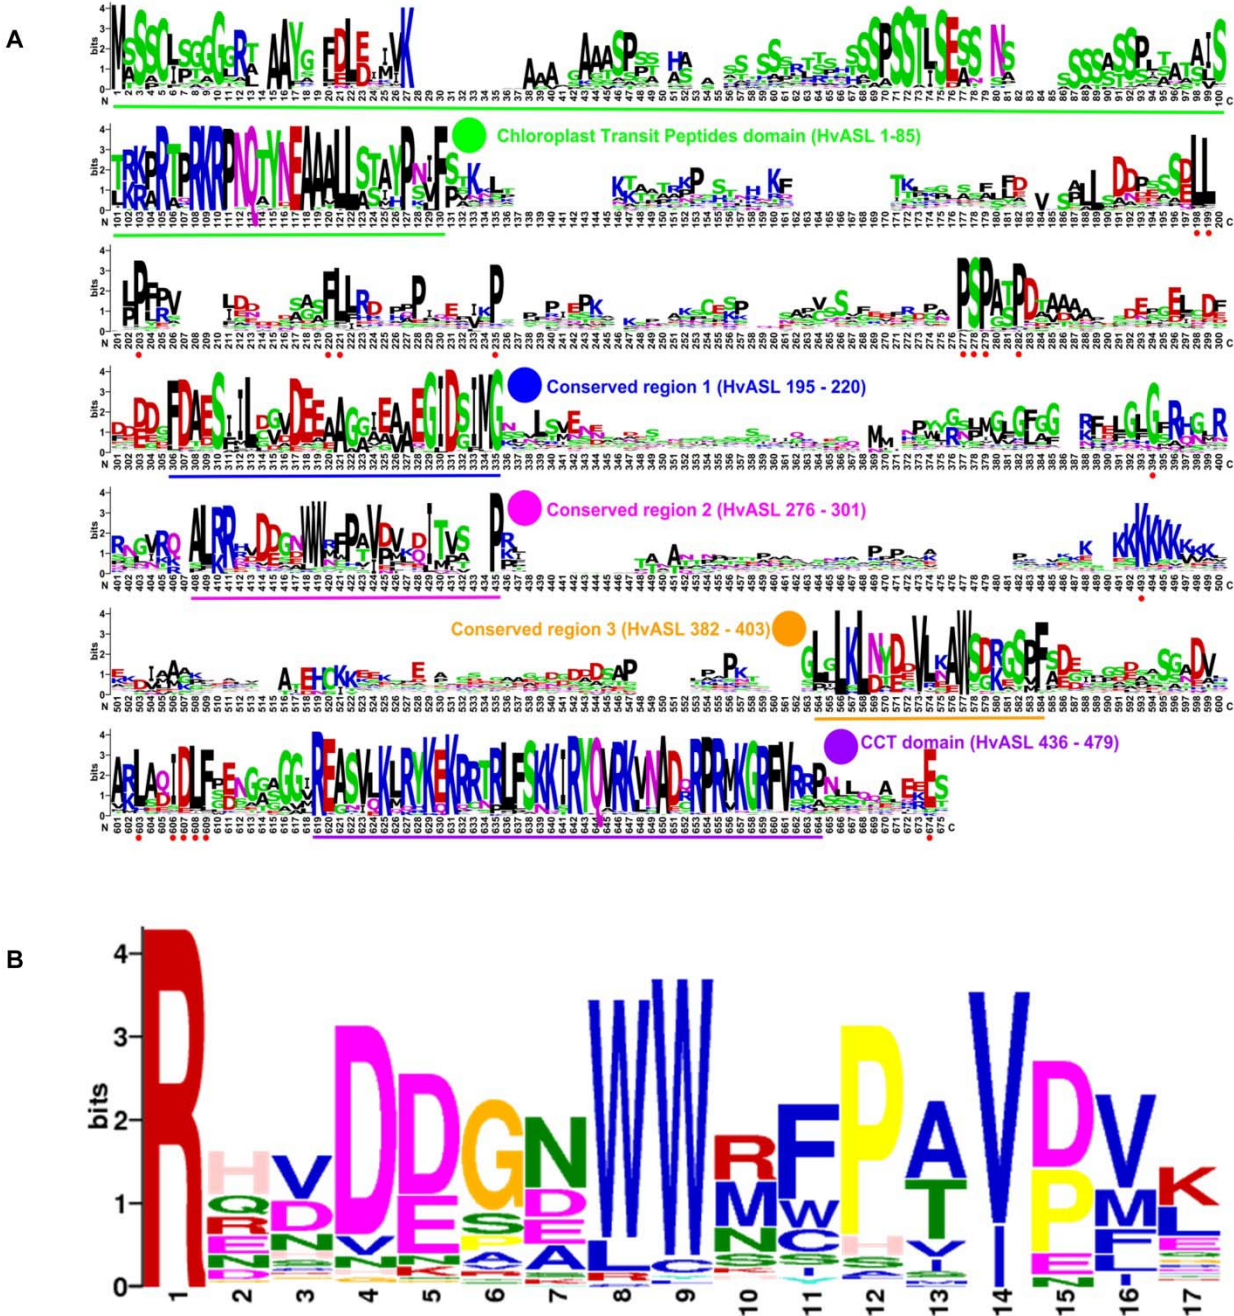

**Figure 4. Novel conserved functional region of HvCMF3.**

1298  
1299

1300 (A) Alignment of 131 HvCMF3 homologous protein sequences from 66 species revealed five conserved  
1301 regions which include the N-terminal chloroplast transit peptides domain, the C-terminal CCT domain and  
1302 three novel conserved regions. In addition, the homologous genes contain multiple conserved peptides  
1303 indicated by red dots below the position IDs. The conserved regions are marked with underline and  
1304 highlighted with coloured circles. The region given in parentheses indicates the corresponding position of  
1305 the conserved region in reference to HvCMF3. Alignment was manually edited by removing wrongly  
1306 predicted sequence regions and by filling gaps. There were a total of 675 positions left. The online tool  
1307 Weblogo was adopted for graphic generation.

1308 (B) Conservation analysis of the functional region of HvCMF3 identified in this study. For each position,  
1309 the overall height of the stack indicates the sequence conservation at that position, while the height of  
1310 symbols within the stack indicates the relative frequency of each amino acid at that position.

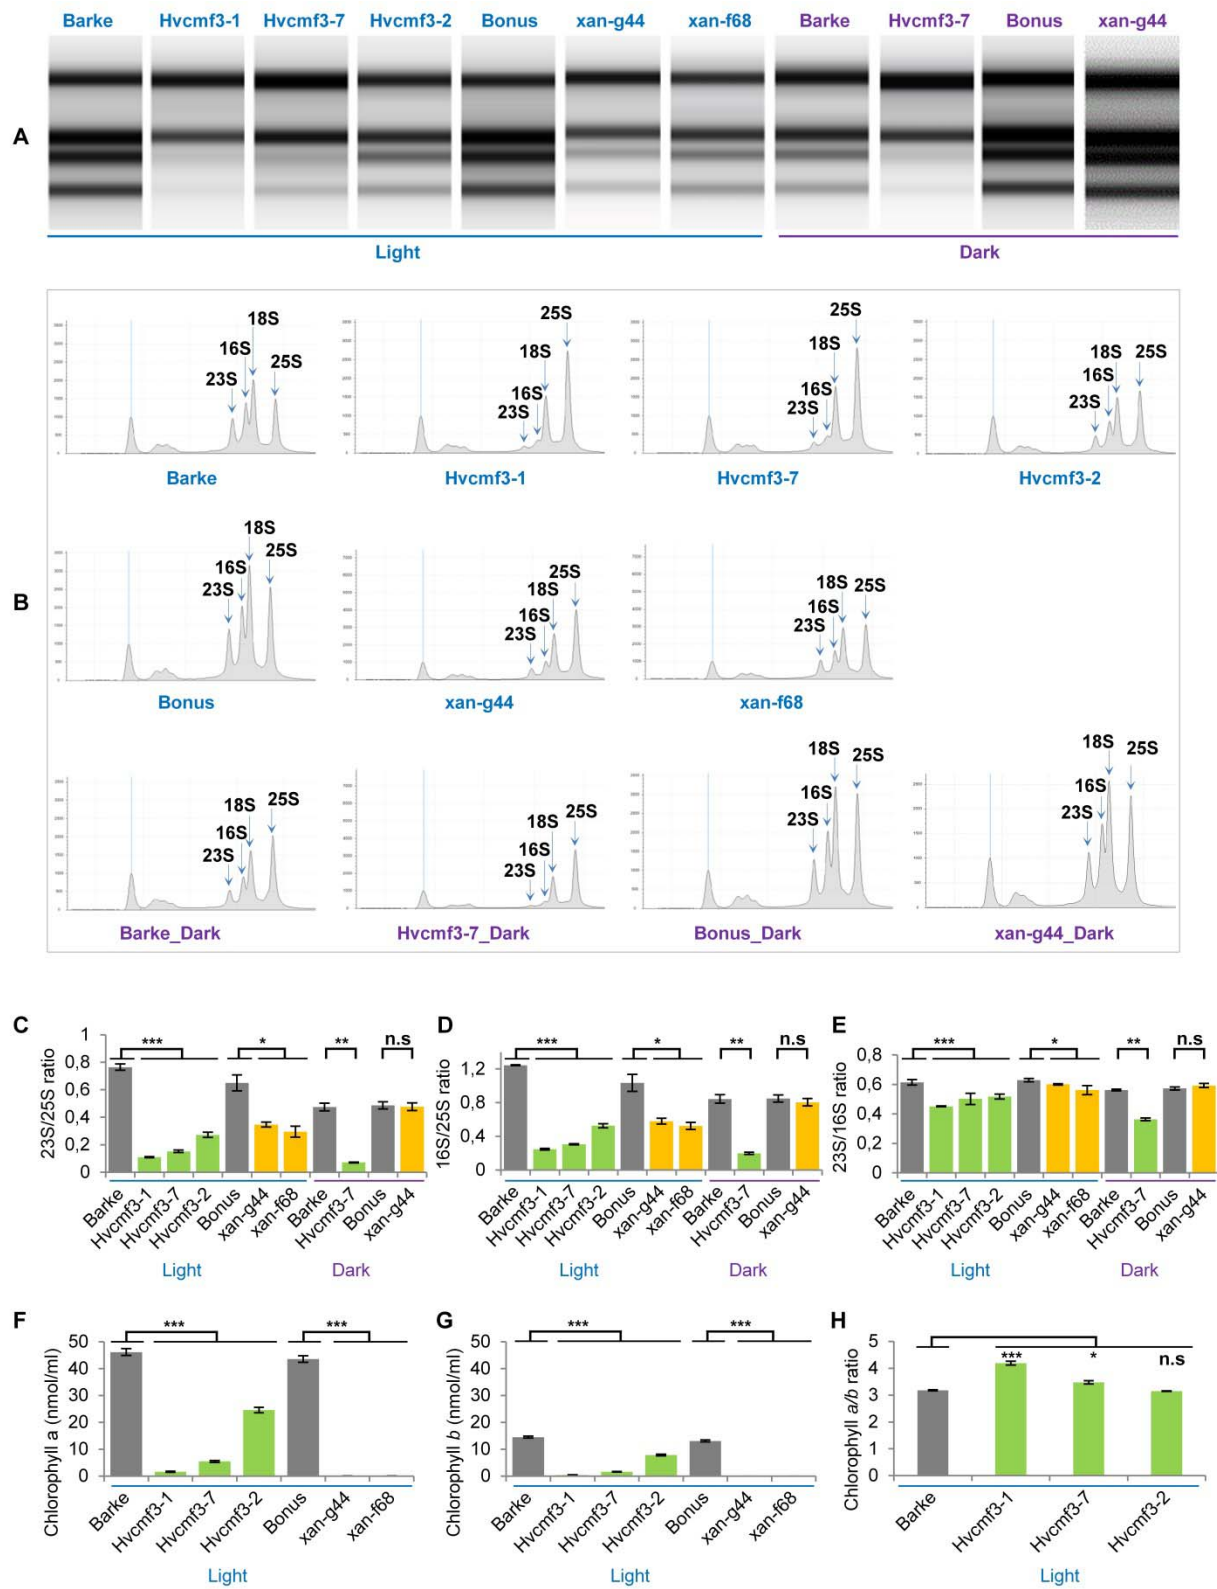

1311

1312 **Figure 5. rRNA analysis and chlorophyll content measurement**

1313 (A) Separation of cytosolic and plastid rRNAs using the Agilent high sensitivity RNA ScreenTape assay.

1314 (B) Analysis of rRNA from wild type, *Hvcmf3* mutants and *xantha* mutants using an Agilent Tapestation  
1315 4200.  
1316 (C) - (D) Determination of plastid-to-cytosolic rRNA ratios. (C) 23S/25S; (D) 16S/25S.  
1317 (E) Ratio of the plastid 23S rRNA to the plastid 16S rRNA.  
1318 (F) – (H) Analysis of chlorophyll contents and ratio between chlorophyll *a* and chlorophyll *b*. Results are  
1319 presented as means  $\pm$  SE. *t*-test significant level: \*  $p < 0.05$ , \*\*  $p < 0.01$ , \*\*\*  $p < 0.001$ , n.s: not significant.  
1320 Three plants per genotype were analyzed.  
1321

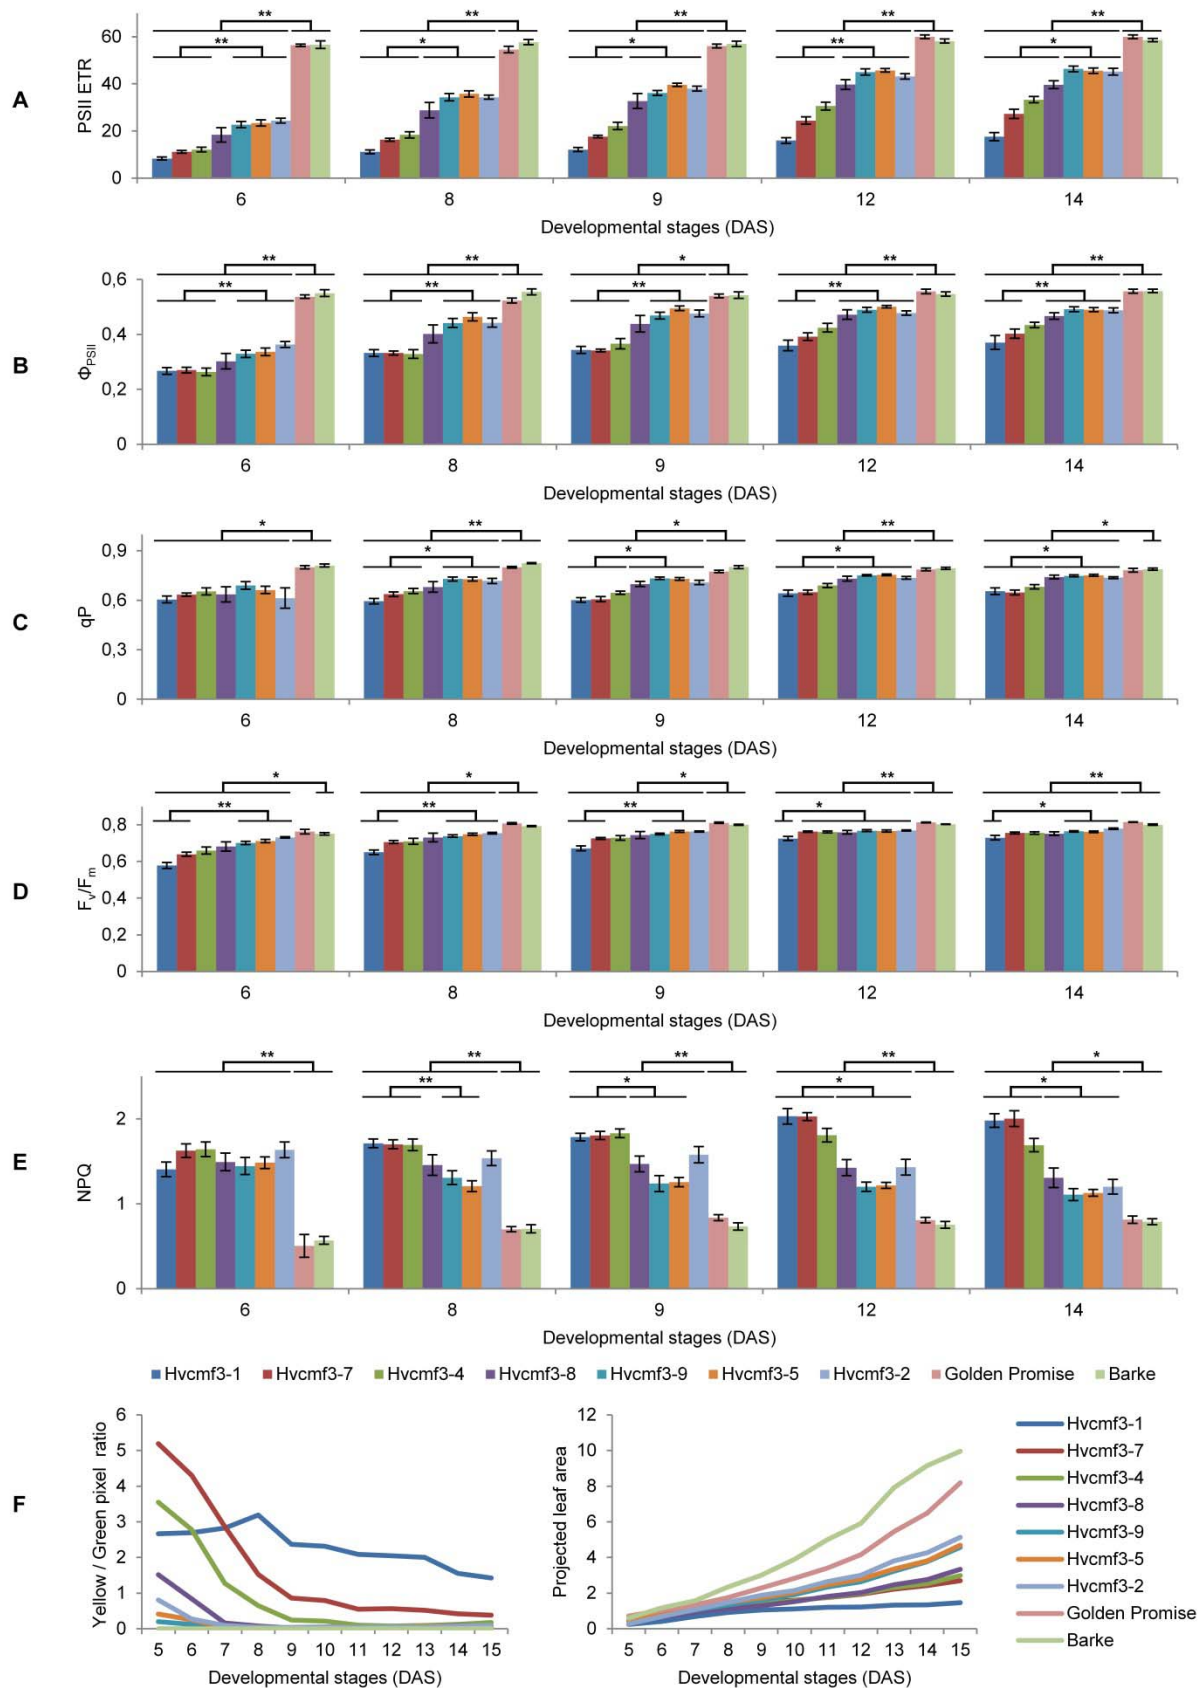



1323 **Figure 6. Determination of photosynthetic parameters and growth dynamics of *Hvcmf3* mutant**  
1324 **and wild-type control plants.**

1325 (A) to (E) Measurement of photosynthetic parameters during early developmental stages. Results are  
1326 presented as means  $\pm$  SE. *Student's t-test* significant levels, \*  $p < 0.05$ , \*\*  $p < 0.01$ . ETR, electron transport  
1327 rate;  $\Phi_{\text{PSII}}$ , photosystem II operating efficiency; qP, fraction of PSII centers that are 'open' based on the  
1328 puddle model;  $F_v/F_m$ , maximum quantum yield of PSII photochemistry measured in the dark-adapted  
1329 state; NPQ, non-photochemical quenching.

1330 (F) Plant growth dynamics. Left panel is yellow/green pixel ratio, and right panel is projected leaf area.

1331

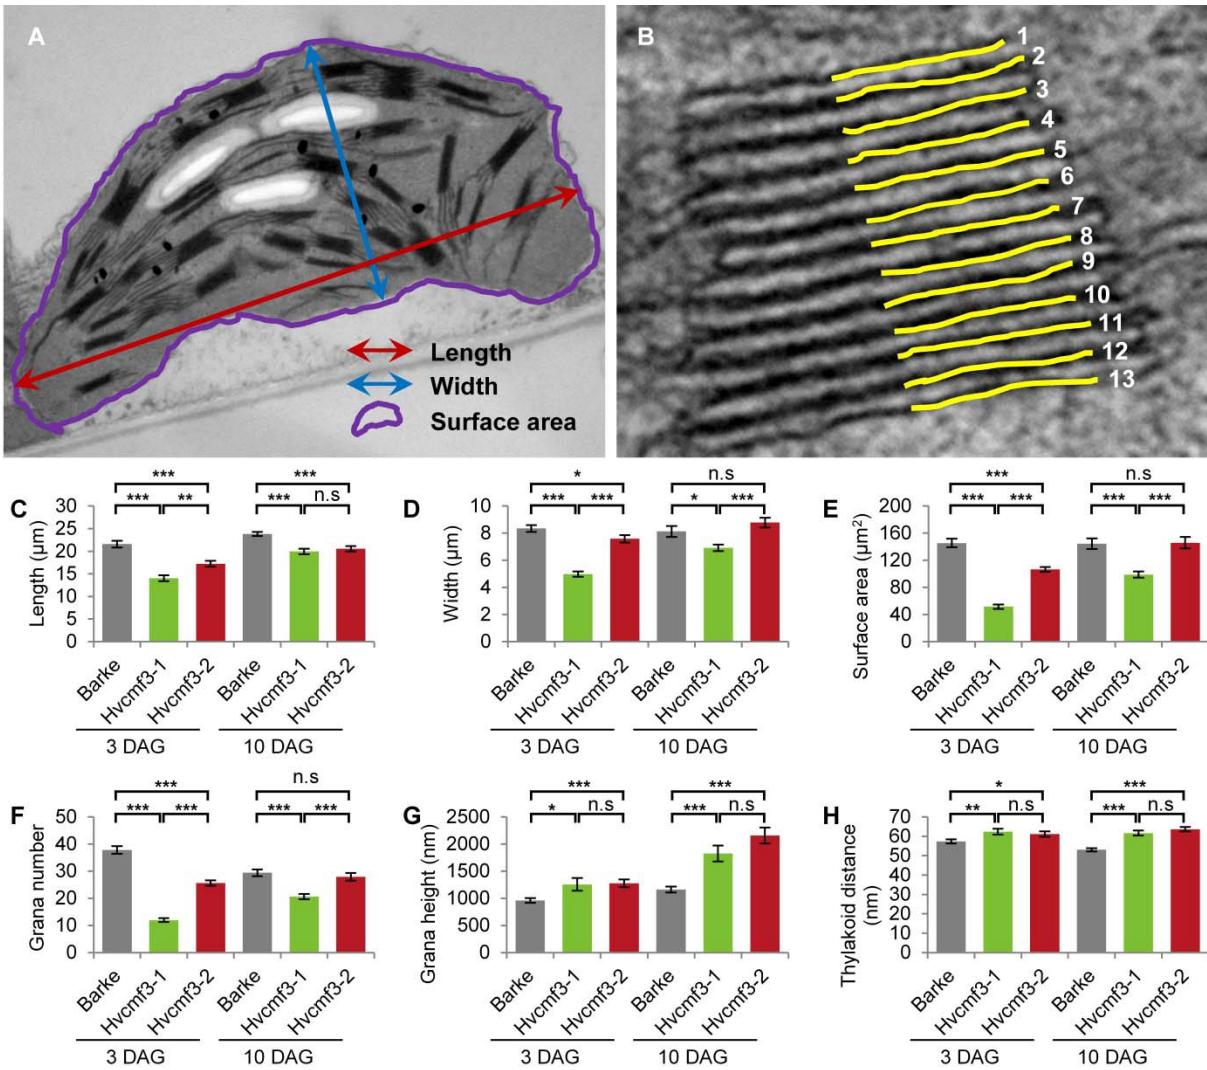

1332

1333 **Figure 7. Quantification of chloroplast architecture components.**

1334 (A) Diagram for demonstrating the chloroplast length, width, and surface area.

1335 (B) Illustration demonstrating the counting of thylakoid.

1336 (C) to (H) Comparison of chloroplast morphology and grana architecture between wild type and *Hvcmf3*  
 1337 mutants at developmental stages 3 days after germination. Chloroplast length (C), chloroplast width (D),  
 1338 chloroplast surface area (E), grana number (F), grana height (G), and thylakoid distance (H). Results are  
 1339 presented as means ± SE. *t*-test significant level: \*  $p < 0.05$ , \*\*  $p < 0.01$ , \*\*\*  $p < 0.001$ , n.s: not significant.  
 1340 Number of chloroplast analyzed  $n \geq 24$ .

1341

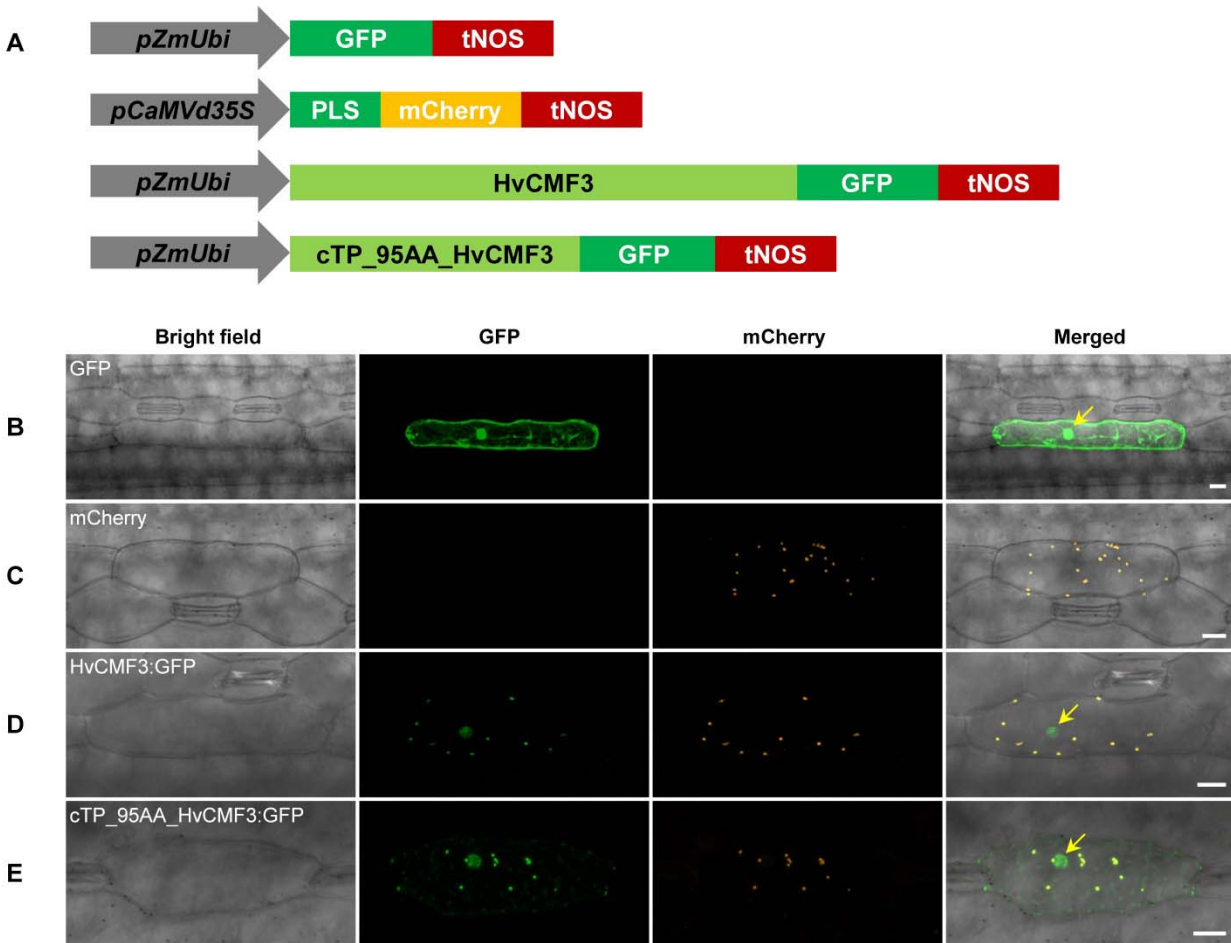

1342

1343 **Figure 8. Subcellular localization of HvCMF3.**

1344 (A) Schematic diagram of the constructs prepared for transient expression. *pZmUbi*, maize *UBIQUITIN1*  
 1345 promoter. *pCaMVd35S*, Cauliflower Mosaic Virus doubled-enhanced 35S promoter. GFP, green  
 1346 fluorescent protein. mCherry, mCherry fluorescent protein; PLS, plastid localization signal, i.e. the  
 1347 chloroplast transit peptide (N-terminal 79 amino acids) of the small subunit of tobacco RUBISCO.  
 1348 HvCMF3, coding sequence of wild-type *HvCMF3* gene. cTP\_95AA\_HvCMF3, N-terminal chloroplast  
 1349 transit peptide of HvCMF3 with a length of 95 amino acids as predicted by online tool PredSL. tNOS,  
 1350 *Agrobacterium nopaline synthase* terminator. The schematic drawing is not in proportion with gene  
 1351 length.

1352 (B) Localization of GFP control with *GFP* being driven by the maize *UBIQUITIN1* promoter.

1353 (C) Localization of the plastid marker.

1354 (D) Localization of HvCMF3:GFP. The GFP fluorescence signal is targeted both to plastid and nucleus  
 1355 compartments.

1356 (E) Localization of cTP\_95AA\_HvCMF3:GFP. The yellow arrows in the merged panels indicate the  
 1357 nucleus. The first leaf of 10-day-old barley seedlings was used for particle bombardment. The  
 1358 fluorescence was checked 24 hours after bombardment. Scale bar for all images is 20  $\mu$ m.
